1 When to be a male? Role of resource-limitation and pollinators in determining gender in an  
2 andromonoecious spiderwort.

3

4

5

6 Asawari Albal<sup>1,3,4</sup>, Azad G<sup>1</sup>, Saket Shrotri<sup>1</sup>, Vinita Gowda<sup>1,2</sup>

7

8

9

10

11 <sup>1</sup>Tropical Ecology and Evolution (TrEE) Lab, Department of Biological Sciences, Indian

12 Institute of Science Education and Research Bhopal, Bhopal, 462066, India

13

14

15 <sup>2</sup>Corresponding author: Vinita Gowda, [gowdav@iiserb.ac.in](mailto:gowdav@iiserb.ac.in)

16

17

18 Present address:

19 <sup>3</sup> Department of Biology, University of Toronto Mississauga, Mississauga, ON L5L 1C6,

20 Canada

21 <sup>4</sup> Ecology and Evolutionary Biology, University of Toronto, Toronto, ON M5S 2Z9, Canada

22

23

24

25

26 **Abstract**

27 The evolution and maintenance of sexual systems in plants is often driven by resource  
28 allocation and pollinator preferences. Gender or sex in plants, therefore, represents a  
29 physiological, functional, and behavioral response of a plant to its environment. Annual,  
30 entomophilous plants have three major constraints towards optimal reproduction: 1) nutrient  
31 resources obtained from the environment, 2) nutrient resources allocated towards  
32 reproduction, i.e., fruits vs. flowers, and 3) pollinator visitations. We know very little about  
33 the role of nutrient resources and pollinators in driving gender expression in flowers in a  
34 natural environment.

35 Andromonoecy is a sexual system where the plant bears both staminate and  
36 hermaphrodite flowers on the same inflorescence and it occurs in ~2% of flowering plants.  
37 Although it has been shown that andromonoecy has evolved multiple times within the  
38 angiosperms, our understanding of the underlying mechanisms of what determines gender  
39 expression in nature is limited. The optimal resource allocation hypothesis, one of the most  
40 widely accepted hypotheses which describes evolution of andromonoecy, suggests that under  
41 nutrient constraints, plants will produce more male flowers since they require lesser energy  
42 investment than the more expensive hermaphrodite flowers. We test this hypothesis in an  
43 andromonoecious plant *Murdannia simplex* (Commelinaceae) by measuring gender  
44 distributions in a large natural population and contrasting the gender distributions between  
45 two different resource conditions (stream population vs. plateau population). We also carried  
46 out choice experiments to quantify if pollinators showed any preference towards a gender.

47 We found that in *M. simplex*, production of hermaphrodite flowers is resource-  
48 dependent and under resource constraints not only fewer numbers of flowers were produced  
49 but also there were a higher number of male flowers. We failed to observe pollinator  
50 preference towards either gender but *Amegilla* spp. (*Zonamegilla*) and *Apis cerana* showed

51 frequency-dependent visitation which suggests that selection on inflorescence size may be an  
52 indirect form of selection pressure exerted by pollinators resulting in gender-bias in the  
53 plants. Thus, we conclude that environmentally driven resource constraints play a bigger role  
54 in driving floral gender expression in *Murdannia* over direct pollinator-driven constraints.

#### 55 **Keywords**

56 Andromonoecy, Commelinaceae, floral gender, male, hermaphrodite, *Murdannia simplex*,  
57 resource limitation, pollinator preference, Western Ghats

#### 58 **Introduction**

59 Andromonoecy refers to the sexual system where both staminate (male) flowers and perfect  
60 (hermaphrodite) flowers are present on the same plant (Yampolsky and Yampolsky 1922,  
61 Bertin 1982a, Miller and Diggle 2003, Vallejo-Marín and Rausher 2007a, 2007b). In  
62 andromonoecious plants, the hermaphrodite flower fulfills the female function in the absence  
63 of a true ‘female’ flower, and it has been suggested that andromonoecy probably evolved  
64 from hermaphroditism by the loss of female reproductive structure (Lloyd 1980, Bertin  
65 1982a). One of the most widely accepted hypotheses on the evolution of andromonoecy is the  
66 optimal resource allocation hypothesis which suggests that under resource limitation, male  
67 flowers will be produced instead of hermaphrodite flowers. This hypothesis rests upon the  
68 premise that male flowers are energetically cheaper to produce because reproductive  
69 allocation towards them ends with pollen production (Anderson and Symon 1989, Narbona et  
70 al. 2002, Verdú et al. 2007), while females are expensive because fruit development and seed  
71 germination are energy-intensive physiological processes (Bertin 1982a, Kaul et al. 2002,  
72 Obeso 2002, Verdú et al. 2007).

73         Examples of reallocation of resources to the cheaper sex (i.e. male bias) have been  
74 shown in several plant species where staminate flowers are produced when nutrient resources  
75 become scarce due to its utilization by the costlier gynoecia towards fruit production (Bertin

76 1982a, 1982b, May and Eugene Spears Jr 1988, Miller and Diggle 2003, Venkatesan 2017).  
77 A well-studied species is *Solanum hirtum* (Solanaceae) in which it has been shown that as a  
78 result of successful pollination, as the ovary develops, resources are relocated within an  
79 inflorescence to the male flowers, thus influencing gender expression and distribution of  
80 gender in successive flowers (Diggle 1993, Miller and Diggle 2003). Another example comes  
81 from *Raphanus raphanistrum*, where Stanton et al. (1987) showed that in plants which were  
82 heavily pollinated, the number of ovules per flower decreased and in contrast, unpollinated  
83 plants did not show any significant decrease in number of ovules. This suggests that plants  
84 can modify their reproductive output to adjust for the resource limitation faced by them.

85 In plants, resource limitation or nutrient limitation that can affect floral gender  
86 expression can be identified as: a) environmental nutrient limitation (Charnov and Bull 1977,  
87 Primack and Lloyd 1980a, Stephenson 1981, Bertin 1982a, Solomon 1985, Diggle 1993),  
88 and/or b) within-plant nutrient limitation (Stephenson 1981, May and Eugene Spears Jr 1988,  
89 Diggle 1993, 1995, Miller and Diggle 2003, Ortiz et al. 2003, Vallejo-Marín and Rausher  
90 2007a). In *Aesculus californica*, *A. pavia*, *Leptospermum scoparium* and *Passiflora*  
91 *incarnata*, phenotypic gender expression (hermaphroditic inflorescences or hermaphroditic  
92 flowers) has been shown to vary as a response to environmental conditions or status of the  
93 nutrient resources, especially during fruit development when resources are limited (Benseler  
94 1975, Primack and Lloyd 1980b, May and Eugene Spears Jr 1988). Further, it has been  
95 shown that the amount of resources that a plant acquires in the proximal and distal ends of the  
96 inflorescence can also vary. The proximal/ basal end of the inflorescence has more resources  
97 than its distal end, which results in more hermaphrodite flowers to be present at basal ranks  
98 of an inflorescence, while male flowers are relegated to the distal end (Faden 1991, Diggle  
99 1994, 1995, 1997, Lewis and Gibbs 1999, Ashman and Hitchens 2000, Miller and Diggle  
100 2003, Kaul and Koul 2008).

101 Bateman's principle (Bateman 1948, Wilson et al. 1994) asserts that- "Fitness gain  
102 through male function is limited primarily by mating opportunity, while fitness gain through  
103 female function is limited primarily by resource availability for offspring production". To  
104 explain the role of male flowers in andromonoecious plants, two, not mutually exclusive  
105 hypotheses have been proposed (Zhang and Tan 2009): i) Pollen donor hypothesis  
106 approaches the problem from the perspective of male reproductive success. It predicts that the  
107 wastage of nutrient resources by investment in the female reproductive structure is reduced  
108 by the production of only male flowers, in a resource-limited condition. ii) Pollinator attractor  
109 hypothesis is based on female reproductive success. It predicts that male flowers increase the  
110 floral display and attract more pollinators at a lower cost and thereby increase the stigmatic  
111 load of the hermaphrodite flowers, which potentially increases female reproductive success at  
112 lower resource investment. The sex allocation theory predicts that by attracting pollinators  
113 which promote outcrossing, floral attractiveness (e.g., large petals, nectar availability) gains  
114 more fitness through the male function than female function (Elle and Meagher 2000).  
115 Although male success should be correlated with mating opportunities, one or a few visits by  
116 pollinators are known to be adequate to fertilize all ovules. Therefore, it is not expected that  
117 female fitness would be strongly affected by floral attractiveness. Thus, in sexually  
118 reproducing plants, investment in the production of flowers is very important since this can  
119 directly translate into reproductive success, and hence reproductive fitness. In entomophilous  
120 plants, pollinator dependence is often driven by floral characteristics, and for successful  
121 pollination, the gender of the flowers and associated floral characters may be very important  
122 (Armbruster 2001, Fenster et al. 2004). In many hermaphroditic plant systems, it has been  
123 shown that several characteristics of an inflorescence such as number of flowers, size of  
124 flowers, and reward of flowers play a critical role in attracting pollinators to the plant (Ortiz  
125 et al. 2003, Christopher et al. 2019). While the role of pollinators is very well known in

126 hermaphroditic systems, the perception of gender, pollinator preference, and reproductive  
127 output in andromonoecious systems are not well studied (see Diggle 1993, Ashman et al.  
128 2000, Ashman and Morgan 2004).

129         Previous studies in sexually dimorphic plants have shown that pollinators typically  
130 show a preference for the functionally male flowers over the conspecific functional female  
131 flowers owing to different floral traits like petal length (Ashman et al. 2000), levels of pollen  
132 production (Bierzychudek 1987, Eckhart 1991) and/or floral scents (Ashman et al. 2005),  
133 where these preferences are learned through foraging experience (Cresswell and Galen 1991).  
134 Zhang and Tan (Zhang and Tan 2009) were the first to examine the function of male flowers  
135 in the andromonoecious *Capparis spinosa* where they showed that the pollinators did not  
136 discriminate between the floral gender morphs, even when they were morphologically  
137 distinct. However, similar studies investigating gender-specific pollinator preferences and  
138 more specifically gender-specific pollinator preferences in sexually dimorphic plants that  
139 have near-identical morphological features are not known.

140         In this study, we explore the effect of nutrient resources as well as pollinator  
141 preference in driving gender expression in a wild population of the andromonoecious  
142 *Murdannia simplex* (Commelinaceae, Spiderworts). The pantropical plant family  
143 Comelinaceae (Spiderworts) is known to have several genera that display andromonoecy.  
144 Despite the dominance of andromonoecy in this family, to date, most pollination studies  
145 within this family have focused only on identifying pollinators (Kaul et al. 2002, Williams  
146 and Walker 2003, Oziegbe et al. 2013, Sigrist and Sazima 2015), and only one study has  
147 explored the role of floral guides in pollinator attraction (Ushimaru et al. 2007). Based on  
148 predictions from the optimal resource allocation hypothesis and pollinator attractor  
149 hypothesis we address the following questions:

150 A) Does the proportion of staminate and perfect flowers in a population represent resource  
151 limitation?

152 B) Do pollinators show preference to any one of the genders?

153 C) Do staminate flowers improve floral display to maintain visitation rate and function as a  
154 cheaper source of outcrossing pollen?

## 155 **Materials and methods**

156 *Murdannia simplex* (Vahl) Brenan (Commelinaceae) is a mass-flowering, sub-erect, annual,  
157 andromonoecious herb which is widely distributed in moist deciduous forests and grasslands  
158 of the Western Ghats of India (Nandikar and Gurav 2015; Fig. 1a). The plant is seasonal, and  
159 the shoot emerges once the monsoonal rains begin, and the flowering lasts from September to  
160 November (Nandikar and Gurav 2015). The plant is 40-65 cm tall and bears a cymose  
161 inflorescence which is a panicle. The inflorescence bears 5-20 purple-colored, three-petaled  
162 male and hermaphrodite flowers (andromonoecy), and each flower measures ~15-25 mm in  
163 diameter. The hermaphrodite flowers are characterized by the presence of a lateral pistil, with  
164 two upper fertile stamens, curved downwards and a third lower sterile stamen. Filaments  
165 have long purple, bearded hair. The flower also bears three trilobed sterile staminodes with  
166 glabrous filaments. The male flowers are characterized only by the lack of a pistil (Fig. 1b -  
167 f). The flowers are defined by a short floral anthesis time, from 12:30 hrs. to 16:00 hrs., with  
168 the principal pollinator reward being pollen grains only (Faden 2000, Nandikar and Gurav  
169 2015).

## 170 *Study site*

171 Western Ghats is one of the four biodiversity ‘hotspots’ in India. The northern part of  
172 Western Ghats is famous for high elevation laterite plateaus and slopes, one of them being  
173 Kaas plateau in Maharashtra (17° 43' 12" N, 73° 49' 22" E), which is located at an altitude of  
174 ~1225 m above sea level (Fig. 1a). Kaas plateau has an area of ~10 km<sup>2</sup> and is situated

175 northwest, about 25 km away from the city of Satara in the western state of Maharashtra. It  
176 was declared as a UNESCO World Heritage site in 2012 due to its highly endemic floral  
177 diversity, which is most abundant in the months of August to November.

178 Capped with red lateritic crusts, the upper Kaas Plateau provides arid habitats except  
179 during the monsoon season (Fig. 1a). It receives over 2500 mm of rain every year, mainly  
180 during the monsoon months (June to September), and the daily mean temperatures are over  
181 22°C (Bhattarai et al. 2012). Floral diversity on the Kaas plateau is a model representation of  
182 flora that is associated with seasonal monsoonal rains in the Western Ghats, as well as the  
183 flora of lateritic plateaus of the Western Ghats. All field experiments were carried out across  
184 three consecutive years - 2017, 2018 and 2019, between 15<sup>th</sup> September and 5<sup>th</sup> November.  
185 The first two years focused on the study of plant-pollinator interactions and the third year  
186 involved the study of the effect of nutrient resources on the gender of the flower, and also  
187 monitored possible yearly fluctuations in gender expression.

#### 188 *Gender distribution in the population*

189 To determine the extent of sexual dimorphism in morphological characters of *M. simplex*,  
190 flower sizes were compared. Pairs of male and hermaphrodite flowers were collected from 15  
191 random inflorescences and then arranged and photographed on a laminated graph sheet. From  
192 these images, petal length and width (widest diameter) were measured manually (Appendix  
193 S1: Fig. S1).

194 In order to identify if the natural gender distribution within a plant and within an  
195 inflorescence were male dominant or hermaphrodite dominant, a multi-year census was  
196 conducted within the Kaas plateau. All census were carried out in the years 2018 and 2019 at  
197 an interval of seven days, across 4 weeks (spanning over one and a half months) covering the  
198 peak flowering season of *M. simplex*. Gender census were conducted between 12:30 hrs. to  
199 16:00 hrs. (anthesis time of *M. simplex* flowers), on marked inflorescences (N = 30). Since a



200 single individual can bear 2-5 inflorescences, a pooled census was taken from all the  
201 inflorescences of a plant as our initial observations found no difference among the  
202 inflorescences within a plant. To identify if there is a positional-gender bias i.e. from basal to  
203 the apical position within an inflorescence (see Stephenson 1981, Diggle 1995, 1997, Cuevas  
204 and Polito 2004) the positions of each flower within an inflorescence were recorded along  
205 with its gender details, over the census duration mentioned above. The positions within an  
206 inflorescence were divided into three categories- apical, middle, and basal as shown in Fig.  
207 1c.

208 To test the effect of nutrient resources on gender expression, a floral gender census  
209 was conducted among two populations that differed in the availability of water and other  
210 resources (presence or absence of a stream and a deep soil substrate), which we observed to  
211 be primary limiting resources on an otherwise homogeneous plateau. The first population is  
212 henceforth referred to as the plateau population - 'Plateau\_pop', while the second population  
213 is referred to as the stream population - 'Stream\_pop'. Plateau\_pop was selected as the  
214 resource-poor population whereas Stream\_pop was selected as the resource-rich population.  
215 The two locations were separated by ~576 meters and other than the presence of a stream and  
216 a deep soil substrate, can be viewed as a single population. The census was carried out in  
217 October 2019 on randomly selected individuals within these two populations (N = 100 per  
218 location).

### 219 *Pollination biology*

220 Pollen is the only pollinator reward present in the genus *Murdannia* (Faden 2000, Nandikar  
221 and Gurav 2015). To identify any quantifiable difference in the pollen or paternal  
222 contribution between the male and hermaphroditic flowers, the amount of pollen per anther in  
223 virgin flowers of *M. simplex* was quantified using a hemocytometer (Bechar et al. 1997).

224 Pollinator visitations on *M. simplex* in the wild were quantified by observing  
225 pollinators in 2 ft. x 2 ft. observation arenas (N = 49) in multiple intervals of 15 minutes  
226 between 12:30 hrs. to 16:00 hrs. (anthesis time of *M. simplex*). Each arena consisted of 4-10  
227 inflorescences having 15-30 flowers per area. Visitation by a pollinator was recorded when a  
228 pollinator was observed to land on the flower and actively collect pollen. The following three  
229 features were recorded and quantified: total number of flowers present, type of pollinator, and  
230 number of pollinator visits in a 15-minute interval. Pollinator visitation rate was then  
231 calculated as the total number of visits per flower per hour. At the end of the flowering  
232 season, fruitset was quantified for *M. simplex* by measuring the number of fruits in randomly  
233 selected inflorescences from the study population in 2017 (N = 26) and 2019 (N = 40).

#### 234 *Gender-specific pollinator preference experiment*

235 Manipulated choice experiments were designed and conducted in the wild in an open  
236 manipulated setup to test: a) presence of visitation bias by pollinators towards male flowers  
237 (M) and/or hermaphrodite flowers (H), and b) presence of floral-density dependent bias by  
238 pollinators. It was hypothesized that if the pollinator has an inherent gender preference,  
239 irrespective of the gender density in a population, pollinators will show high visitation to the  
240 same gender. Floral distributions within an inflorescence were defined to have binary  
241 outcomes i.e., male abundant or hermaphrodite abundant, or equally male and  
242 hermaphroditic. The experimental setup consisted of two pots that were kept one foot apart  
243 with a total of 5-15 flowers in each pot and pollinator visits were quantified by eye between  
244 12:30 hrs. to 16:00 hrs. Three gender-density treatments:  $H < M$  (T1),  $H = M$  (T2) and  $H > M$   
245 (T3) were tested. The density of flowers of the two genders in each experimental set up was  
246 manually controlled and each treatment was repeated for a total of eight trials and a total  
247 observation time of ~21.5 hours (Appendix S1: Fig. S2). Unmanipulated, wild set up  
248 observations served as the control. The mean visitation rate per flower to male flowers and

249 hermaphrodite flowers were calculated for each pollinator type, by dividing the total number  
250 of visits by a specific pollinator with the total number of flowers present in the experimental  
251 set up. Pollinator visitation rate was calculated as the total number of visits per flower per  
252 hour.

253         The overall visitation observed in all three different density treatments in the  
254 manipulative choice experiment were compared to test the effect of change in density on the  
255 visitation pattern of pollinators in this andromonoecious species. The visitation rates in the  
256 control treatments (natural visitations) were calculated and compared with the visitation rates  
257 obtained in our choice experiment ( $H < M$ ,  $H = M$  and  $H > M$ ). The mean visitation rates  
258 across all three treatments were also compared with the total number of flowers present in the  
259 trial to identify any effect of floral display size.

#### 260 *Statistical analysis*

261 All analyses were performed in R (R Core Team 2019) and raw data was tested for normality  
262 before proceeding with statistical analysis using Shapiro-Wilk's method. When Gaussian  
263 type distribution could not be assumed, non-parametric Kruskal-Wallis rank-sum tests were  
264 run using the dplyr package (from tidyverse package; Wickham et al. 2019). The floral  
265 diameters and pollen densities per flower between male and hermaphrodite flowers were  
266 compared using unpaired two-sample t-test. The variation in proportion of male and  
267 hermaphrodite flowers was quantified using Kruskal-Wallis test, and post hoc Dunn's test  
268 (Dinno 2017) was used to identify the significant differences in proportion of genders  
269 between the four weeks. Simple linear regression was used to check the effect of mean  
270 number of male flower, hermaphrodite flowers and total flowers on the fruitset respectively,  
271 and the effect of total floral display size on the mean visitation rate across the three  
272 treatments in the choice experiments. The alpha was set at 0.5 ( $P < 0.025$ ) for all statistical

273 analysis. All graphical plots were produced using the ggplot2 package in R (from tidyverse  
274 package; Wikcham et al. 2019).

## 275 **Results**

### 276 *Gender distribution in the population*

277 Due to the small size and fragile nature of the flower, floral size was measured as the widths  
278 of the flowers. The floral morphometry between the size of male and hermaphrodite flowers  
279 showed no significant difference ( $t = 0.11072$ ,  $df = 28$ ,  $p$ -value = 0.9126; Appendix S1: Fig.  
280 S1). Throughout the flowering season, male flowers were present in higher proportions than  
281 the hermaphrodite flowers in all the study plots by at least 70-80% (Kruskal-Wallis chi-  
282 squared = 38.707,  $df = 7$ ,  $p$ -value =  $2.223 \times 10^{-6}$ ; Fig. 2a; Appendix S1: Table S1). A slight  
283 decrease in the proportion of male flowers was observed only in week 4 (Mean±SE: Week 1  
284 =  $1.33 \pm 0.31$ , Week 2 =  $1.6 \pm 0.29$ , Week 3 =  $1.73 \pm 0.35$ , Week 4 =  $0.87 \pm 0.22$ ; Fig. 2a;  
285 Appendix S1: Table S1). In contrast, the number of hermaphrodite flowers remained similar  
286 across all four weeks of observation (Mean±SE: Week 1 =  $0.60 \pm 0.21$ , Week 2 =  $0.33 \pm 0.12$ ,  
287 Week 3 =  $0.50 \pm 0.27$ , Week 4 =  $0.40 \pm 0.22$ ; Fig. 2a; Appendix S1: Table S1) and only plants  
288 that were closer to the water source i.e. stream population, had a significantly higher number  
289 of hermaphrodite flowers (Mean±SE: Plateau\_pop H =  $0.43 \pm 0.07$  vs. Stream\_pop H =  
290  $1.75 \pm 0.14$ ;  $p$ -values = 0.0000; Fig. 3; Appendix S1: Table S2). Overall, the mean number of  
291 total flowers remained consistent for the first two weeks (Mean±SE: Week 1 =  $1.93 \pm 0.39$ ,  
292 Week 2 =  $1.93 \pm 0.37$  flowers; Fig. 2a inset), increased in week 3 ( $2.23 \pm 0.41$  flowers) and then  
293 reduced in week 4 ( $1.26 \pm 0.28$  flowers; Kruskal-Wallis chi-squared = 3.2847,  $df = 3$ ,  $p$ -value  
294 = 0.3498; Appendix S1: Table S1).

295 Within an inflorescence, male and hermaphrodite flowers were present in all the three  
296 positions i.e. apical, middle and basal positions (Fig. 1c), and the mean number of male  
297 flowers varied across all these three positions during our four-week observation period. The

298 number of male flowers were relatively consistent in the basal position throughout the plants'  
299 flowering season, than in the middle position or apical position (Fig. 2 b - e; Appendix S1:  
300 Table S3, S4). We documented the highest number of male flowers in the middle position of  
301 the inflorescence, whereas the number of hermaphrodite flowers was consistent at all  
302 positions over the flowering season (Fig. 2 b - e; Appendix S1: Table S3, S4).

303 The total number of flowers was significantly higher in the stream population than in  
304 the plateau population (Mean±SE: Plateau\_pop = 2.78±0.12 vs. Stream\_pop = 3.32±0.17;  $t =$   
305 -2.5646,  $df = 176.65$ ,  $p$ -value = 0.0116; Fig. 3 inset) and the stream population also showed  
306 similar proportions of male and hermaphrodite flowers (Mean±SE: Stream\_pop H =  
307 1.75±0.14 vs. Stream\_pop M = 1.57±0.14;  $p$ -value = 0.1614; Fig. 3). Proportion of male  
308 flowers was significantly greater in the plateau population over the stream population  
309 (Mean±SE: Plateau\_pop M = 2.35±0.12 vs. Stream\_pop M = 1.57±0.14;  $p$ -value = 0.0000;  
310 Fig. 3; Appendix S1: Table S2).

311 The mean fruit set per plant showed no effect with the total number of male,  
312 hermaphrodite, or total number of flowers present per plant, respectively in the plateau\_pop  
313 (hermaphrodite:  $r^2 = -0.0457$ ,  $df = 18$ ,  $p$ -value = 0.6852; Fig. 4a; male:  $r^2 = -0.04999$ ,  $df =$   
314 18,  $p$ -value = 0.761; Fig. 4b; total flowers:  $r^2 = -0.04254$ ,  $df = 18$ ,  $p$ -value = 0.6412; Fig. 4c),  
315 and in the stream\_pop (hermaphrodite:  $r^2 = -0.05543$ ,  $df = 18$ ,  $p$ -value = 0.9637; Fig. 4d;  
316 male:  $r^2 = 0.1125$ ,  $df = 18$ ,  $p$ -value = 0.08134; Fig. 4e; total flowers:  $r^2 = 0.04828$ ,  $df = 18$ ,  
317  $p$ -value = 0.1781; Fig. 4f), respectively.

### 318 *Pollination biology*

319 Flowers of both the genders opened between 12:30 hrs. to 16:00 hrs., and the mean pollen  
320 count for both the genders ranged from 5000-10000 pollen grains per anther and no  
321 significant difference in the pollen quantity between the two genders was observed ( $t =$   
322 0.67913,  $df = 60$ ,  $p$ -value = 0.4997; Azad 2018, Albal 2019, Nawge 2019). The major

323 pollinators to *M. simplex*, in the order of visitation rates from highest to lowest were *Apis*  
324 *dorsata* (Mean number of visits per flower per hour $\pm$ SE = 1.01 $\pm$ 0.18), *Apis cerana*  
325 (0.86 $\pm$ 0.10), *Apis florea* (0.76 $\pm$ 0.22), and *Amegilla spp.* (*Zonamegilla*, 0.3 $\pm$ 0.09)  
326 respectively. *Amegilla spp.* showed significantly lower visitation than all the other pollinators  
327 (Kruskal-Wallis chi-squared = 6.5702, df = 3, *p*-value = 0.09; *p*-values: *Amegilla spp.* vs *A.*  
328 *cerana* = 0.0074, *Amegilla spp.* vs *A. dorsata* = 0.0058, *Amegilla spp.* vs *A. florea* = 0.0469),  
329 whereas the visitation rates among *A. cerana*, *A. florea* and *A. dorsata* were not significantly  
330 different (*p*-values: *A. cerana* vs *A. dorsata* = 0.3822, *A. cerana* vs *A. florea* = 0.4278, *A.*  
331 *dorsata* vs *A. florea* = 0.3748; Azad 2018). Other pollinators observed were *Paragus spp.*  
332 (Hoverfly), *Lasioglossum spp.*, *Pseudapis spp.* and two more species that we could not  
333 identify, henceforth referred to as UnID sp. 3 and UnID sp. 4 (Fig. 5). Mean pollinator  
334 visitation rates were observed to be high at the beginning of the anthesis (1.74-1.94 flowers  
335 from 13:00 hrs. to 15:00 hrs.) and it decreased with time (0.94-1.32 flowers from 15:00 hrs.  
336 till anthesis end; Azad 2018).

### 337 *Gender specific pollinator preference experiment*

338 In all the experimental setups in the manipulated choice experiment, pollinator visitations  
339 were highest to the most abundant gender (Kruskal-Wallis chi-squared = 65.3103, df = 7, *p*-  
340 value = 1.303<sup>e-11</sup>; Fig. 6; Appendix S1: Table S5). Pollinator visitation rates were  
341 significantly different between hermaphrodite flowers in the unmanipulated, wild set up  
342 (control) and hermaphrodite flowers in all the experimental setups (Fig. 6; Appendix S1:  
343 Table S5). However, the visitation rates to the male flowers in the control were not different  
344 from those to male flowers in all the experimental setup (Fig. 6; Appendix S1: Table S5).  
345 Display size (total number of flowers per trial) had no effect on the visitation rates in any of  
346 the manipulated treatments ( $r^2 = -0.03765$ , df = 21, *p*-value = 0.6309; Appendix S1: Fig. S3).

347 Quantification of pollinator-wise visitation rates in the manipulated experiments show  
348 that visitations by *Apis cerana*, *Amegilla spp.* and UnID sp. 4 were higher to male flowers in  
349 treatment 1 where male flowers were more abundant than hermaphrodite flowers (Mean  
350 visitation rate per flower per hr $\pm$ SE:- H < M: *A. cerana* = 3.29 $\pm$ 1.11, *Amegilla spp.* =  
351 1.81 $\pm$ 0.91, UnID sp. 4 = 2.49 $\pm$ 1.89 flowers; Kruskal-Wallis chi-squared = 13.8517, df = 9, *p*-  
352 value = 0.1277; Fig. 7a; Appendix S1: Table S6). In treatment 3, *Apis cerana*, *Amegilla spp.*,  
353 and UnID sp. 4 showed high visitation to hermaphrodite flowers (H > M: *A. cerana* =  
354 2.76 $\pm$ 0.74, *Amegilla spp.* = 0.89 $\pm$ 0.61, UnID sp. 4 = 0.66 $\pm$ 0.56 flowers; Kruskal-Wallis chi-  
355 squared = 9.2848, df = 5, *p*-value = 0.09823; Fig. 7c; Appendix S1: Table S6). We observed  
356 visitation by hoverflies only in treatment 2 (H = M: Visitation rate per hermaphrodite flower  
357 = 0.56, visitation rate per male flower = 0.75; Kruskal-Wallis chi-squared = 15.605, df = 11,  
358 *p*-value = 0.1565; Fig. 7b; Appendix S1: Table S6).

## 359 Discussion

### 360 *Gender distribution in the population*

361 The optimal allocation hypothesis proposes that between a costly and a cheaper gender, in a  
362 resource-limited environment, the gender which requires the least resources will be preferred.  
363 From a plant's perspective, the male flowers are considered a cheaper gender to produce  
364 because there is no investment towards fruit development, unlike the hermaphrodite flowers  
365 which produces both viable pollen and ovules (Bertin 1982a, Anderson and Symon 1989,  
366 Kaul et al. 2002, Narbona et al. 2002, Obeso 2002, Verdú et al. 2007, Zhang and Tan 2009).  
367 Here, we show that the *M. simplex* population on Kaas plateau has a higher density of male  
368 flowers and the only individuals that showed a slight reduction in the number of male flowers  
369 and an increase in hermaphrodite flowers were the ones present along the stream. We  
370 consider the stream population of *M. simplex* to have better resources available to them than  
371 the plateau population because of the presence of water (a limited resource otherwise on the

372 plateau) and possible higher nutrient availability due to dissolved/associated nutrients in the  
373 water and deeper soil substrate available for the plants (Watve 2013, Ramey and Richardson  
374 2017, Thorpe et al. 2018). This suggests that although the general tendency of *M. simplex* is  
375 to produce more male flowers over hermaphrodites, water and water-dissolved minerals may  
376 be major limiting resources and in the absence of resource constraints the plants can produce  
377 not only more flowers but also higher number of hermaphrodite flowers.

### 378 *Gender shift with time*

379 Resources available and utilized by plants often fluctuate with time and age of the plant  
380 (Stephenson 1982, Solomon 1985). We observed an initial increase in the number of flowers  
381 followed by a decreasing trend in the total number of flowers being produced per plant  
382 throughout its flowering period (Fig. 2a inset). Within this trend, male flowers were always  
383 produced in higher proportions than the hermaphrodite flowers and interestingly, in the end  
384 of the flowering season (i.e. fourth week) we observed a reduction in the number of male  
385 flowers instead of the number of hermaphrodite flowers (Fig. 2a). Thus, although resource  
386 constraints do affect the production of total flowers as observed in the stream vs. plateau  
387 population, resource limitation due to the flowering stage of the plant only affected the  
388 number of male flowers in *M. simplex*. It has been shown that under declining resource levels  
389 plants may opt to increase their fitness by producing the relatively inexpensive male flowers  
390 over the expensive female flowers (May and Eugene Spears Jr 1988). Further, it has been  
391 reported in *C. benghalensis* that a plant will opt to drop a flower rather than dropping a fruit,  
392 under resource limiting conditions, because the nutrient resources that would get committed  
393 to fruits that is aborted would be saved halfway (Kaul and Koul 2008). We propose that a  
394 similar strategy may be operational in *M. simplex* wherein under availability of resources *M.*  
395 *simplex* may be producing excess of male flowers which are the first ones to be sacrificed  
396 when resource limitation starts to be an important factor as the phenology of the plant



397 progresses (Fig. 2a). The lack of change in the number of hermaphrodite flowers in different  
398 stages of plant's flowering phenology also suggests that the hermaphrodite flowers may  
399 already be produced at an optimal amount, resulting in the maintenance of their number  
400 despite declining resources at the later stages (Fig. 2a).

401 Gender distribution of flowers on an inflorescence has been shown to be dependent on  
402 resource allocation (Diggle 1995, 1997, Miller and Diggle 2003), and it has been observed  
403 that the differential positioning of the genders within an inflorescence can affect outcrossing  
404 rates (Orth and Waddington 1997, Lin and Forrest 2019). Studies in *Solanum* (Diggle 1994,  
405 1995, 1997, Miller and Diggle 2003), *Caesalpinia* (Lewis and Gibbs 1999), *F. virginiana*  
406 (Ashman and Hitchens 2000) and in other Commelinaceae genera (Faden 1991, Kaul et al.  
407 2002, Kaul and Koul 2008) have shown that higher accessibility to nutrient resources at the  
408 base of an inflorescence (than the distal end) can result in the presence of higher resource-  
409 demanding hermaphrodite flowers in the basal position while males are relegated to the  
410 middle and apical positions of an inflorescence. We found a similar pattern in *M. simplex*,  
411 where a greater number of male flowers were produced at the middle and the apical positions  
412 on an inflorescence. However, unlike other plants where hermaphrodites exclusively occupy  
413 the basal positions in an inflorescence, in *M. simplex* hermaphrodites were also present in the  
414 apical position. In fact, the distribution of hermaphrodite flowers was not significantly  
415 different across all the three positions, over the course of the plant's flowering season. This  
416 implies that any manipulation in display size is carried out by increasing or decreasing the  
417 male flowers thus regulating the floral display at a much lesser cost (as proposed in *Solanum*  
418 by Anderson and Symon 1989).

#### 419 *Pollination biology*

420 For inflorescence size to affect reproductive success, the number of flowers visited per  
421 inflorescence by pollinators must increase with display size because pollinators have been

422 shown to display higher preference to larger inflorescences (Stephenson 1981, Harder and  
423 Barrett 1995, Ohashi and Yahara 2001). Hence the disproportionate gender distribution  
424 within the inflorescence of an andromonoecious species may be a result of indirect pollinator  
425 selection through inflorescence size: that is larger inflorescences are better at attracting  
426 pollinators but under nutrient resource limitation, this can be achieved only by producing  
427 more male flowers, which are cheaper to produce (Sandring and Ågren 2009). Thus our  
428 results support the pollinator attractor hypothesis as proposed by Zhang and Tan (2009) and  
429 sex allocation theory as proposed by Elle and Meagher (2000) where they predicted that male  
430 flowers can increase the floral display and their attractiveness to pollinators at a lower cost  
431 through male function than female function and thereby increase the stigmatic load of the  
432 hermaphrodite flowers, which potentially increases female reproductive success at lower  
433 resource investment.

434         The dominant pollinator assemblage of *M. simplex* consisted mainly of different  
435 species of bees from the two genera of bees common in the Indian tropics - *Apis* and  
436 *Amegilla*. All pollinators that visit *M. simplex* are generalists and are known to be common  
437 pollinators in grassland habitats (Corlett 2011, Dhargalkar 2019, Nawge 2019). There are at  
438 least 68 plants co-flowering with *M. simplex* on the Kaas plateau (Dhargalkar 2019) and  
439 parallel studies on the pollination of plants in the Kaas community showed that both *Apis*  
440 *cerana* and *Apis florea* switch to *M. simplex* from *M. lanuginosa* (anthesis time 10.30 hrs.-  
441 13.00 hrs.) and various *Impatiens* species as soon as the flowers of *M. simplex* open i.e. at  
442 12:30 hrs. up to 16:00 hrs. (Albal 2019). This suggests that although the pollinators are  
443 generalists, these pollinators may be displaying temporal specialization towards *M. simplex*.  
444 Future studies will focus on temporal specialization of the bee communities on Kaas plateau,  
445 which will provide insight on pollinator preference towards *M. simplex* in a multi-species  
446 environment.

447 *Gender-specific pollinator preference*

448 Several studies have shown that pollinators avoid functionally female flowers because of  
449 decreased pollen or absence of pollen (Bierzychudek 1987, Eckhart 1991), floral size  
450 (Ashman et al. 2000), floral scents (Ashman et al. 2005) and pollen-pistil interference  
451 (Solomon 1985, Elle and Meagher 2000). However, in *M. simplex* both male and  
452 hermaphrodite flowers showed comparable total pollen production. This has been shown in  
453 other andromonoecious systems as well such as in *Solanum carolinense* (Solomon 1986),  
454 *Olea europaea* (Cuevas and Polito 2004) and *Dichorisandra spp.* (Sigrist and Sazima 2015),  
455 where the male flowers play a crucial role in the reproductive success of the plant by  
456 increasing the total number of pollen grains available per plant. As previously discussed, we  
457 observed that nutrient resources affected the number of male flowers and not the number of  
458 hermaphrodite flowers, and the rate of fruit sets were observed to be similar between the  
459 plateau and the stream populations (Mean±SE: Plateau\_pop = 3.22±0.23 vs. Stream\_pop =  
460 3.55±0.21). This suggests that reproductive success is limited by the availability of  
461 hermaphrodite flowers and not pollinator visitations. The lack of preference for either of the  
462 gender by the pollinators on Kaas plateau is further supported by our observations from the  
463 manipulative experiment where all pollinators except *A. cerana* displayed lack of preference  
464 towards either of the floral genders. Further, this also fails to support the hypothesis that  
465 male-dominant inflorescences of *M. simplex* may be under pollinator-mediated selection due  
466 to direct pollinator preference for any gender (see Solomon 1985, Eckhart 1991, Elle and  
467 Meagher 2000). However, since pollinator visitations were observed to be density dependent  
468 (i.e. floral density, compare treatment 3 with treatment 1, Fig. 7c) it is possible that  
469 pollinator-mediated selection is acting on male flowers through selection of larger  
470 inflorescence sizes.

471 Our understanding of pollinator services by bees primarily come from *Bombus*  
472 species (Chittka et al. 1997, 1999) and *Apis mellifera* (Martin 2004, Howard et al. 2019) and  
473 studies on other bees from India are very rare (see Somanathan and Borges 2001). At least  
474 five species of bees visited *M. simplex* and in the choice experiment, we observed inter-  
475 species behavioral differences among bees both in their floral preferences and visitation  
476 patterns, respectively. Almost all bees displayed higher visitation to any gender which was  
477 present in greater density, suggesting that pollinator visitations are predominantly gender-  
478 nonspecific and density-dependent. A slight preference for gender was only observed in *A.*  
479 *cerana* and *Amegilla* in treatment 2 (H = M) where male flowers were preferred over  
480 hermaphrodite flowers (Fig. 7b). Bees are known for both their short-term and long-term  
481 memory retention and they can show learning through foraging experience (Cresswell and  
482 Galen 1991, Schiestl and Johnson 2013) and we propose that the higher visitation to male  
483 flowers in treatment 2 (Fig. 7b) may be a result of short-term memories and habituation in  
484 bees since in natural conditions bees may encounter more male flowers than hermaphrodites.

485 We conclude that in *M. simplex* environmentally driven resource constraints play a  
486 bigger role than pollinator preference towards a specific gender in determining gender  
487 expression. However, we cannot dismiss an indirect role of pollinator-driven constraints  
488 which may occur through selection on the display size as proposed in the pollinator attractor  
489 hypothesis (Zhang and Tan 2009). In a resource-limited environment such as the one  
490 observed at Kaas plateau, *M. simplex* can thus increase its display size by producing the less  
491 expensive male flowers over hermaphrodite flowers.

492 Energy constraints will have a direct cost on floral production if genders require  
493 differential resource allocation. As a result, it can be expected that the gender of the flowers  
494 will be selected accordingly. Using the *M. simplex* system, we show that the gender  
495 expression is directly influenced by the availability of nutrient resources in the plants'

496 environment and indirectly affected by the pollinators' preference for larger display sizes of  
497 the inflorescence. Thus, a combination of both environmental factors as well as ecological  
498 factors may be responsible for the evolution and maintenance of andromonoecy in mass-  
499 flowering plants such as *M. simplex* in the tropics.

#### 500 **Acknowledgements**

501 The authors thank the Ministry of Human Resource Development, India (MHRD) and the  
502 National Geographic Society for research funds to VG, IISER Bhopal for the infrastructure,  
503 DST for INSPIRE fellowship to AA, AG, and SS. We also thank the PCCF of Maharashtra  
504 Forest Department, DFO of Satara Division (Forest Department) and the Joint Forest  
505 Management Committee (JFMC), Kaas, Satara for permitting our fieldwork. We also thank  
506 Dr. Natapot Warrit (Chulalongkorn University, Thailand) and Dr. Ximo Mengual (Research  
507 Museum Alexander Koenig, Germany) for their help with taxonomic identification of the  
508 pollinators. Finally, we thank all fellow TrEE lab members for their advice, discussion, and  
509 support.

#### 510 **Author contributions**

511 VG conceived the idea, AA, AG, and VG designed the experiments. AA and AG conducted  
512 the fieldwork with help from SS. AA performed the statistical analyses with inputs from SS  
513 and VG. AA and VG wrote the manuscript and AG and SS helped with edits. All authors  
514 read and approved the final draft of the manuscript.

#### 515 **Literature cited**

516 Albal, A. 2019. When does a flower become male? Exploring role of ecological factors and  
517 energy resources in defining gender expression in sympatric plants. Master's thesis,  
518 IISER Bhopal, India R00529:14030.  
519 Anderson, G. J., and D. E. Symon. 1989. Functional dioecy and andromonoecy in *Solanum*.  
520 Evolution 43:204.

- 521 Armbruster, W. S. 2001. Evolution of floral form: Electrostatic forces , pollination, and  
522 adaptive compromise. *New Phytologist* 152:181–186.
- 523 Ashman, T. L., M. Bradburn, D. H. Cole, B. H. Blaney, and R. A. Raguso. 2005. The scent of  
524 a male: The role of floral volatiles in pollination of a gender dimorphic plant. *Ecology*  
525 86:2099–2105.
- 526 Ashman, T. L., and M. S. Hitchens. 2000. Dissecting the causes of variation in intra-  
527 inflorescence allocation in a sexually polymorphic species, *Fragaria virginiana*  
528 (Rosaceae). *American Journal of Botany* 87:197–204.
- 529 Ashman, T. L., and M. T. Morgan. 2004. Explaining phenotypic selection on plant attractive  
530 characters: Male function, gender balance or ecological context? *Proceedings of the*  
531 *Royal Society B: Biological Sciences* 271:553–559.
- 532 Ashman, T. L., J. Swetz, and S. Shivitz. 2000. Understanding the basis of pollinator  
533 selectivity in sexually dimorphic *Fragaria virginiana*. *Oikos* 90:347–356.
- 534 Azad, G. 2018. Resource allocation and pollinator preference □: role of male flowers in the  
535 andromonoecious herb *Murdannia simplex* (Commelinaceae). Master’s thesis, IISER  
536 Bhopal, India R00335:13035.
- 537 Bateman, A. J. 1948. Intra-sexual selection in *Drosophila*. *Heredity* 2:349–368.
- 538 Bechar, A., S. Gan-Mor, Y. Vaknin, I. Shmulevich, B. Ronen, and D. Eisikowitch. 1997. An  
539 image-analysis technique for accurate counting of pollen on stigmas. *New Phytologist*  
540 137:639–643.
- 541 Benseler, R. W. 1975. Floral biology of California buckeye. *Madroño* 23:41–53.
- 542 Bertin, R. I. 1982a. The evolution and maintenance of andromonoecy. *Evolutionary Theory*  
543 6:25–32.
- 544 Bertin, R. I. 1982b. The ecology of sex expression in red buckeye. *Ecology* 63:445–456.
- 545 Bhattarai, U., P. Tetali, and S. Kelso. 2012. Contributions of vulnerable hydrogeomorphic

- 546 habitats to endemic plant diversity on the Kas Plateau, Western Ghats. SpringerPlus 1:1-  
547 9.
- 548 Bierzychudek, P. 1987. Pollinators increase the cost of sex by avoiding female flowers.  
549 Ecology 68:444–447.
- 550 Charnov, E., and J. Bull. 1977. When is sex environmentally determined? Nature 266:828–  
551 832.
- 552 Chittka, L., A. Gumbert, and J. Kunze. 1997. Foraging dynamics of bumble bees: Correlates  
553 of movements within and between plant species. Behavioral Ecology 8:239–249.
- 554 Chittka, L., J. D. Thomson, and N. M. Waser. 1999. Flower constancy, insect psychology,  
555 and plant evolution. Naturwissenschaften 86:361–377.
- 556 Christopher, D. A., R. J. Mitchell, D. W. Trapnell, P. A. Smallwood, W. R. Semski, and J. D.  
557 Karron. 2019. Hermaphroditism promotes mate diversity in flowering plants. American  
558 Journal of Botany 106:1131–1136.
- 559 Corlett, R. T. 2011. Honeybees in natural ecosystems. In: Hepburn, H. and Radloff, S.E.  
560 (Eds) Honeybees of Asia. Springer- Verlag Berlin Heidelberg Pages 215-225
- 561 Cresswell, J. E., and C. Galen. 1991. Frequency-dependent selection and adaptive surfaces  
562 for floral character combinations: The pollination of *Polemonium viscosum*. The  
563 American Naturalist 138:1342–1353.
- 564 Cuevas, J., and V. S. Polito. 2004. The role of staminate flowers in the breeding system of  
565 *Olea europaea* (Oleaceae): An andromonoecious, wind-pollinated taxon. Annals of  
566 Botany 93:547–553.
- 567 Dhargalkar, R. K. 2019. A study of the temporal patterns in flowering phenology and plant-  
568 pollinator network of a grassland community in the northern Western Ghats ,  
569 Maharashtra. Master's thesis, IISER Bhopal, India R00534:14054.
- 570 Diggle, P. K. 1993. Developmental plasticity , genetic variation , and the evolution of

- 571 andromonoecy in *Solanum hirtum* (Solanaceae). *American Journal of Botany* 80:967–  
572 973.
- 573 Diggle, P. K. 1994. The expression of andromonoecy in *Solanum hirtum* (Solanaceae):  
574 Phenotypic plasticity and ontogenetic contingency. *American Journal of Botany*  
575 81:1354–1365.
- 576 Diggle, P. K. 1995. Architectural effects and the interpretation of patterns of fruit and seed  
577 development. *Annual Review of Ecology and Systematics* 26:531–552.
- 578 Diggle, P. K. 1997. Ontogenetic contingency and floral morphology: The effects of  
579 architecture and resource limitation. *International Journal of Plant Sciences* 158:99–107.
- 580 Dinno, A. 2017. `dunn.test`: Dunn’s test of Multiple comparisons using rank sums.
- 581 Eckhart, V. M. 1991. The effects of floral display on pollinator visitation vary among  
582 populations of *Phacelia linearis* (Hydrophyllaceae). *Evolutionary Ecology* 5:370–384.
- 583 Elle, E., and T. R. Meagher. 2000. Sex allocation and reproductive success in the  
584 andromonoecious perennial *Solanum carolinense* (Solanaceae). II. Paternity and  
585 functional gender. *American Naturalist* 156:622–636.
- 586 Faden, R. B. 1991. The morphology and taxonomy of *Aneilema* R. Brown (Commelinaceae).  
587 *Smithsonian contributions to Botany* 76.
- 588 Faden, R. B. 2000. Floral biology of Commelinaceae. Pages 309–317 *Monocots: Systematics*  
589 *and Evolution*.
- 590 Fenster, C. B., W. S. Armbruster, P. Wilson, M. R. Dudash, and J. D. Thomson. 2004.  
591 Pollination Syndromes and Floral Specialization. *Annual Review of Ecology, Evolution,*  
592 *and Systematics* 35:375–403.
- 593 Harder, L. D., and S. C. H. Barrett. 1995. Mating costs of large floral displays in  
594 hermaphrodite plants. *Nature* 373:512–515.
- 595 Howard, S. R., M. Shrestha, J. Schramme, J. E. Garcia, A. Avarguès-Weber, A. D. Greentree,



- 596 and A. G. Dyer. 2019. Honeybees prefer novel insect-pollinated flower shapes over bird-  
597 pollinated flower shapes. *Current Zoology* 65:457–465.
- 598 Kaul, V., and A. K. Koul. 2008. Floral phenology in relation to pollination and reproductive  
599 output in *Commelina caroliniana* (Commelinaceae). *Australian Journal of Botany*  
600 56:59–66.
- 601 Kaul, V., N. Sharma, and A. K. Koul. 2002. Reproductive effort and sex allocation strategy in  
602 *Commelina benghalensis* L., a common monsoon weed. *Botanical Journal of the*  
603 *Linnean Society* 140:403–413.
- 604 Lewis, G., and P. Gibbs. 1999. Reproductive biology of *Caesalpinia calycina* and *C.*  
605 *pluviosa* (Leguminosae) of the caatinga of north-western Brazil. *Plant Systematics and*  
606 *Evolution* 217:43–53.
- 607 Lin, S., and J. R. K. Forrest. 2019. The function of floral orientation in bluebells □:  
608 interactions with pollinators and rain in two species of *Mertensia* (Boraginaceae).  
609 *Journal of Plant Ecology* 12:113–123.
- 610 Lloyd, D. G. 1980. Sexual strategies in Plants: I. An hypothesis of serial adjustment of  
611 maternal investment during one reproductive session. *New Phytologist* 86:69–79.
- 612 Martin, N. H. 2004. Flower size preferences of the honeybee (*Apis mellifera*) foraging on  
613 *Mimulus guttatus* (Scrophulariaceae). *Evolutionary Ecology Research* 6:777–782.
- 614 May, P. G., and E. Eugene Spears Jr. 1988. Andromonoecy and variation in phenotypic  
615 gender of *Passiflora incarnata* (Passifloraceae). *American Journal of Botany* 75:1830–  
616 1841.
- 617 Miller, J. S., and P. K. Diggle. 2003. Diversification of andromonoecy in *Solanum* section  
618 *Lasiocarpa* (Solanaceae): The roles of phenotypic plasticity and architecture. *American*  
619 *Journal of Botany* 90:707–715.
- 620 Nandikar, M. D., and R. V. Gurav. 2015. Revision of the genus *Murdannia* (Commelinaceae)

- 621 in India. *Phytodiversity* 2:56–112.
- 622 Narbona, E., P. L. Ortiz, and M. Arista. 2002. Functional Andromonoecy in *Euphorbia*  
623 (Euphorbiaceae). *Annals of Botany* 89:571–577.
- 624 Nawge, V. V. 2019. Understanding pollination networks on Kaas plateau. Master's thesis,  
625 IISER Bhopal, India R00543:14097.
- 626 Obeso, J. R. 2002. The costs of reproduction in plants. *New Phytologist* 155:321–348.
- 627 Ohashi, K., and T. Yahara. 2001. Behavioural responses of pollinators to variation in floral  
628 display size and their influences on the evolution of floral traits. In: Chittka, L.,  
629 Thomson, J.D. *Cognitive Ecology of Pollination- Animal behaviour and floral evolution*.  
630 Cambridge University Press Pages 274-296.
- 631 Orth, A. I., and K. D. Waddington. 1997. The movement patterns of carpenter bees *Xylocopa*  
632 *micans* and bumblebees *Bombus pennsylvanicus* on *Pontederia cordata* inflorescences.  
633 *Journal of Insect Behavior* 10:79-86.
- 634 Ortiz, P. L., M. Arista, P. E. Oliveira, and S. Talavera. 2003. Pattern of flower and fruit  
635 production in *Stryphnodendron adstringens*, an andromonoecious legume tree of Central  
636 Brazil. *Plant Biology* 5:592–599.
- 637 Oziegbe, M., I. O. Akinlua, and A. A. Olalekan. 2013. Comparative pollination role of  
638 stamens and breeding system in three species of *Commelina* (Commelinaceae) in Ile-Ife,  
639 Nigeria. *Acta Botanica Brasilica* 27:543–550.
- 640 Primack, R. B., and D. G. Lloyd. 1980a. Andromonoecy in the New Zealand montane shrub  
641 Manuka, *Leptospermum scoparium* (Myrtaceae). *American Journal of Botany* 67:361–  
642 368.
- 643 Primack, R. B., and D. G. Lloyd. 1980b. Sexual strategies in plants IV. The distributions of  
644 gender in two monomorphic shrub populations. *New Zealand Journal of Botany* 18:109–  
645 114.

- 646 R Team, C. 2019. R: A language and environment for Statistical Computing. R Foundation  
647 for Statistical Computing, Vienna, Austria. <https://www.r-project.org/>
- 648 Ramey, T. L., and J. S. Richardson. 2017. Terrestrial Invertebrates in the Riparian Zone:  
649 Mechanisms Underlying Their Unique Diversity. *BioScience* 67:808–819.
- 650 Sandring, S., and J. Ågren. 2009. Pollinator-mediated selection on floral display and  
651 flowering time in the perennial herb *Arabidopsis lyrata*. *Evolution* 63:1292–1300.
- 652 Schiestl, F. P., and S. D. Johnson. 2013. Pollinator-mediated evolution of floral signals.  
653 *Trends in Ecology and Evolution* 28:307–315.
- 654 Sigrist, M. R., and M. Sazima. 2015. Phenology, reproductive biology and diversity of  
655 buzzing bees of sympatric *Dichorisandra* species (Commelinaceae): breeding system  
656 and performance of pollinators. *Plant Systematics and Evolution* 301:1005–1015.
- 657 Solomon, B. P. 1985. Environmentally influenced changes in sex expression in an  
658 andromonoecious plant. *Ecology* 66:1321–1332.
- 659 Solomon, B. P. 1986. Sexual allocation and andromonoecy: Resource investment in male and  
660 hermaphrodite flowers of *Solanum carolinense* (Solanaceae). *American Journal of*  
661 *Botany* 73:1215–1221.
- 662 Somanathan, H., and R. M. Borges. 2001. Nocturnal pollination by the carpenter bee  
663 *Xylocopa tenuiscapa* (Apidae) and the effect of floral display on fruit set of  
664 *Heterophragma quadriloculare* (Bignoniaceae) in India. *Biotropica* 33:78–89.
- 665 Stanton, M. L., J. K. Berezky, and H. D. Hasbrouck. 1987. Pollination thoroughness and  
666 maternal yield regulation in wild radish, *Raphanus raphanistrum* (Brassicaceae).  
667 *Oecologia* 74:68–76.
- 668 Stephenson, A. G. 1981. Flower and fruit abortion: proximate causes and ultimate functions.  
669 *Annual Review of Ecology and Systematics* 12:253–279.
- 670 Stephenson, A. G. 1982. When does outcrossing occur in a mass-flowering plant? *Evolution*

- 671 36:762–767.
- 672 Thorpe, C. J., T. R. Lewis, S. Kulkarni, A. Watve, N. Gaitonde, D. Pryce, L. Davies, D. T.  
673 Bilton, and M. E. Knight. 2018. Micro-habitat distribution drives patch quality for sub-  
674 tropical rocky plateau amphibians in the northern Western Ghats, India. PLoS ONE  
675 13:1–20.
- 676 Ushimaru, A., T. Watanabe, and K. Nakata. 2007. Colored floral organs influence pollinator  
677 behavior and pollen transfer in *Commelina communis* (Commelinaceae). American  
678 Journal of Botany 94:249–258.
- 679 Vallejo-Marín, M., and M. D. Rausher. 2007a. The role of male flowers in andromonoecious  
680 species: Energetic costs and siring success in *Solanum carolinense* L. Evolution 61:404–  
681 412.
- 682 Vallejo-Marín, M., and M. D. Rausher. 2007b. Selection through female fitness helps to  
683 explain the maintenance of male flowers. The American Naturalist 169:563.
- 684 Venkatesan, A. 2017. Why be a male? Resource allocation and floral display in a wild  
685 population of *Solanum surattense*. Master’s thesis, IISER Bhopal, India R00064:10015.
- 686 Verdú, M., K. Spanos, I. Čaňová, B. Slobodník, and L. Paule. 2007. Similar gender  
687 dimorphism in the costs of reproduction across the geographic range of *Fraxinus ornus*.  
688 Annals of Botany 99:183–191.
- 689 Watve, A. 2013. Status review of Rocky plateaus in the northern Western Ghats and Konkan  
690 region of Maharashtra, India with recommendations for conservation and management.  
691 Journal of Threatened Taxa 5:3935–3962.
- 692 Wikcham, H., M. Averick, J. Bryan, W. Chang, L. D. McGowan, R. Francois, G. Grolemond,  
693 A. Hayes, L. Henry, J. Hester, M. Kuhn, T. L. Pedersen, E. Miller, S. M. Bache, K.  
694 Muller, J. Ooms, D. Robinson, D. P. Seidel, V. Spinu, K. Takahashi, D. Vaughan, C.  
695 Wilke, K. Woo, and H. Yutani. 2019. tidyverse: Welcome to tidyverse.

- 696 Williams, G., and K. Walker. 2003. Pollination of the wet forest herb *Polliia crispata*  
697 (Commelinaceae). *Cunninghamia* 8(1):141–146.
- 698 Wilson, P., J. D. Thomson, M. L. Stanton, and L. P. Rigney. 1994. Beyond floral Batemanian:  
699 Gender biases in selection for pollination success. *The American Naturalist* 143:283-296.
- 700 Yampolsky, E., and H. Yampolsky. 1922. Distribution of sex forms in the phanerogamic  
701 flora. *Bibliographia genetica* 3:1–62.
- 702 Zhang, T., and D. Y. Tan. 2009. An examination of the function of male flowers in an  
703 andromonoecious shrub *Capparis spinosa*. *Journal of Integrative Plant Biology* 51:316–  
704 324.
- 705
- 706
- 707
- 708
- 709
- 710
- 711
- 712
- 713
- 714
- 715
- 716
- 717
- 718
- 719
- 720

721 **Figure legends**

722 **Fig. 1** Habitat and floral features of *Murdannia simplex* (a) habitat on Kaas Plateau,  
723 Maharashtra during flowering season (Inset: Location in India), (b) *M. simplex* habit, (c)  
724 inflorescence image showing positions identified from base to the apex, (d) *M. simplex*  
725 flower front view, (e) *M. simplex* male flower, (f) *M. simplex* hermaphrodite flower. Photo  
726 courtesy: (a), (c), (d) - Asawari Albal, (b), (e), (f) - Saket Shrotri.

727 **Fig. 2** Variation in gender in *M. simplex* (a) by week from first flowering date (Kruskal-  
728 Wallis chi-squared = 38.7067, df = 7,  $p$ -value = 0.00;  $P < 0.025$ ) (Inset: Week-wise proportion  
729 of total number of flowers; Kruskal-Wallis chi-squared = 3.2847, df = 3,  $p$ -value = 0.3498, N  
730 = 30;  $P < 0.025$ ) (See Appendix S1: Table S1) and (b) - (e) within-inflorescence from Week 1  
731 - Week 4 respectively (Kruskal-Wallis chi-square test; df = 5,  $P < 0.025$ ). For (a) columns to  
732 be compared within the week and within gender (Mean $\pm$ SE). For (b) columns to be compared  
733 within the gender and within positions, across all 4 weeks (Mean $\pm$ SE). Significant  $p$ -values  
734 depicted by different alphabets (Appendix S1: Table S3;  $P < 0.025$ ).

735 **Fig. 3** Natural gender distribution observed in *M. simplex* in 2019 between two populations  
736 (Mean $\pm$ SE) (Kruskal-Wallis chi-squared = 123.53, df = 3,  $p$ -value  $< 2.2^{e-16}$ , N = 100 per  
737 population; Appendix S1: Table S2;  $P < 0.025$ ) (Inset: Total number of flowers across the two  
738 populations;  $t = -2.5646$ , df = 176.65,  $p$ -value = 0.0116). Male flowers are represented by  
739 open squares, hermaphrodite flowers represented by filled squares and the gray squares  
740 represent total (male + hermaphrodite) flowers. Columns to be compared within population  
741 and within genders across the two populations only.

742 **Fig. 4** For plateau\_pop in 2019, effect on mean fruitset by (a) mean number of male flowers  
743 ( $r^2 = -0.04999$ , df = 18,  $p$ -value = 0.761, N = 20), (b) mean number of hermaphrodite  
744 flowers ( $r^2 = -0.0457$ , df = 18,  $p$ -value = 0.6852, N = 20) and (c) mean number of flowers per  
745 plant ( $r^2 = -0.04254$ , df = 18,  $p$ -value = 0.6412, N = 20). For stream\_pop in 2019, effect on

746 mean fruitset by (f) mean number of male flowers ( $r^2 = 0.1125$ ,  $df = 18$ ,  $p$ -value = 0.08134,  
747  $N = 20$ ), (e) mean number of hermaphrodite flowers ( $r^2 = -0.05543$ ,  $df = 18$ ,  $p$ -value =  
748 0.9637,  $N = 20$ ) and (f) mean number of flowers per plant ( $r^2 = 0.04828$ ,  $df = 18$ ,  $p$ -value =  
749 0.1781,  $N = 20$ ).

750 **Fig. 5** Pollinators of *M. simplex* from Kaas plateau: (a) and (b) *Amegilla spp.* (*Zonamegilla*);  
751 (c) *Apis florea*; (d) *Apis cerana*; (e) *Apis dorsata*; (f) *Paragus sp.* (Hoverfly); (g)  
752 *Lasioglossum sp.*; (h) and (i) *Pseudapis sp.* Photo courtesy- (a) - (d), (f), (h), (i) : Asawari  
753 Albal and (e), (g): Saket Shrotri.

754 **Fig. 6** Mean pollinator visitation rate per flower per hour (Mean±SE) observed in the  
755 manipulative experiment where three treatments with varying numbers of hermaphrodite and  
756 male flowers were used to test pollinator preference towards a gender; (Kruskal-Wallis chi-  
757 squared = 63.4196,  $df = 7$ ,  $p$ -value =  $3.122 \times 10^{-11}$ ,  $N = 8$  trials for each treatment;  $P < 0.025$ ).  
758 Male flowers are represented by open squares and hermaphrodite flowers are represented by  
759 the filled squares. The first two columns represent the natural visitation rate observed per  
760 flower per hour for both male and hermaphrodite, respectively. Different alphabets depict  
761 significantly different values (Appendix S1: Table S5;  $P < 0.025$ ).

762 **Fig. 7** Pollinator-wise mean visitation rate per flower per hour in the manipulative experiment  
763 on *M. simplex* (Mean±SE) (a) Treatment 1-  $H < M$  (Kruskal-Wallis chi-squared = 13.8517,  $df$   
764 = 9,  $p$ -value = 0.1277;  $P < 0.025$ ; Appendix S1: Table S6), (b) Treatment 2-  $H = M$  (Kruskal-  
765 Wallis chi-squared = 15.605,  $df = 11$ ,  $p$ -value = 0.1565;  $P < 0.025$ ; Appendix S1: Table S6),  
766 (c) Treatment 3-  $H > M$  (Kruskal-Wallis chi-squared = 9.2848,  $df = 5$ ,  $p$ -value = 0.09823;  
767  $P < 0.025$ ; Appendix S1: Table S6). Male flowers are represented by open squares and  
768 hermaphrodite flowers are represented by filled squares. Different alphabets depict  
769 significantly different values (Appendix S1: Table S6;  $P < 0.025$ ).

770 **Figures**



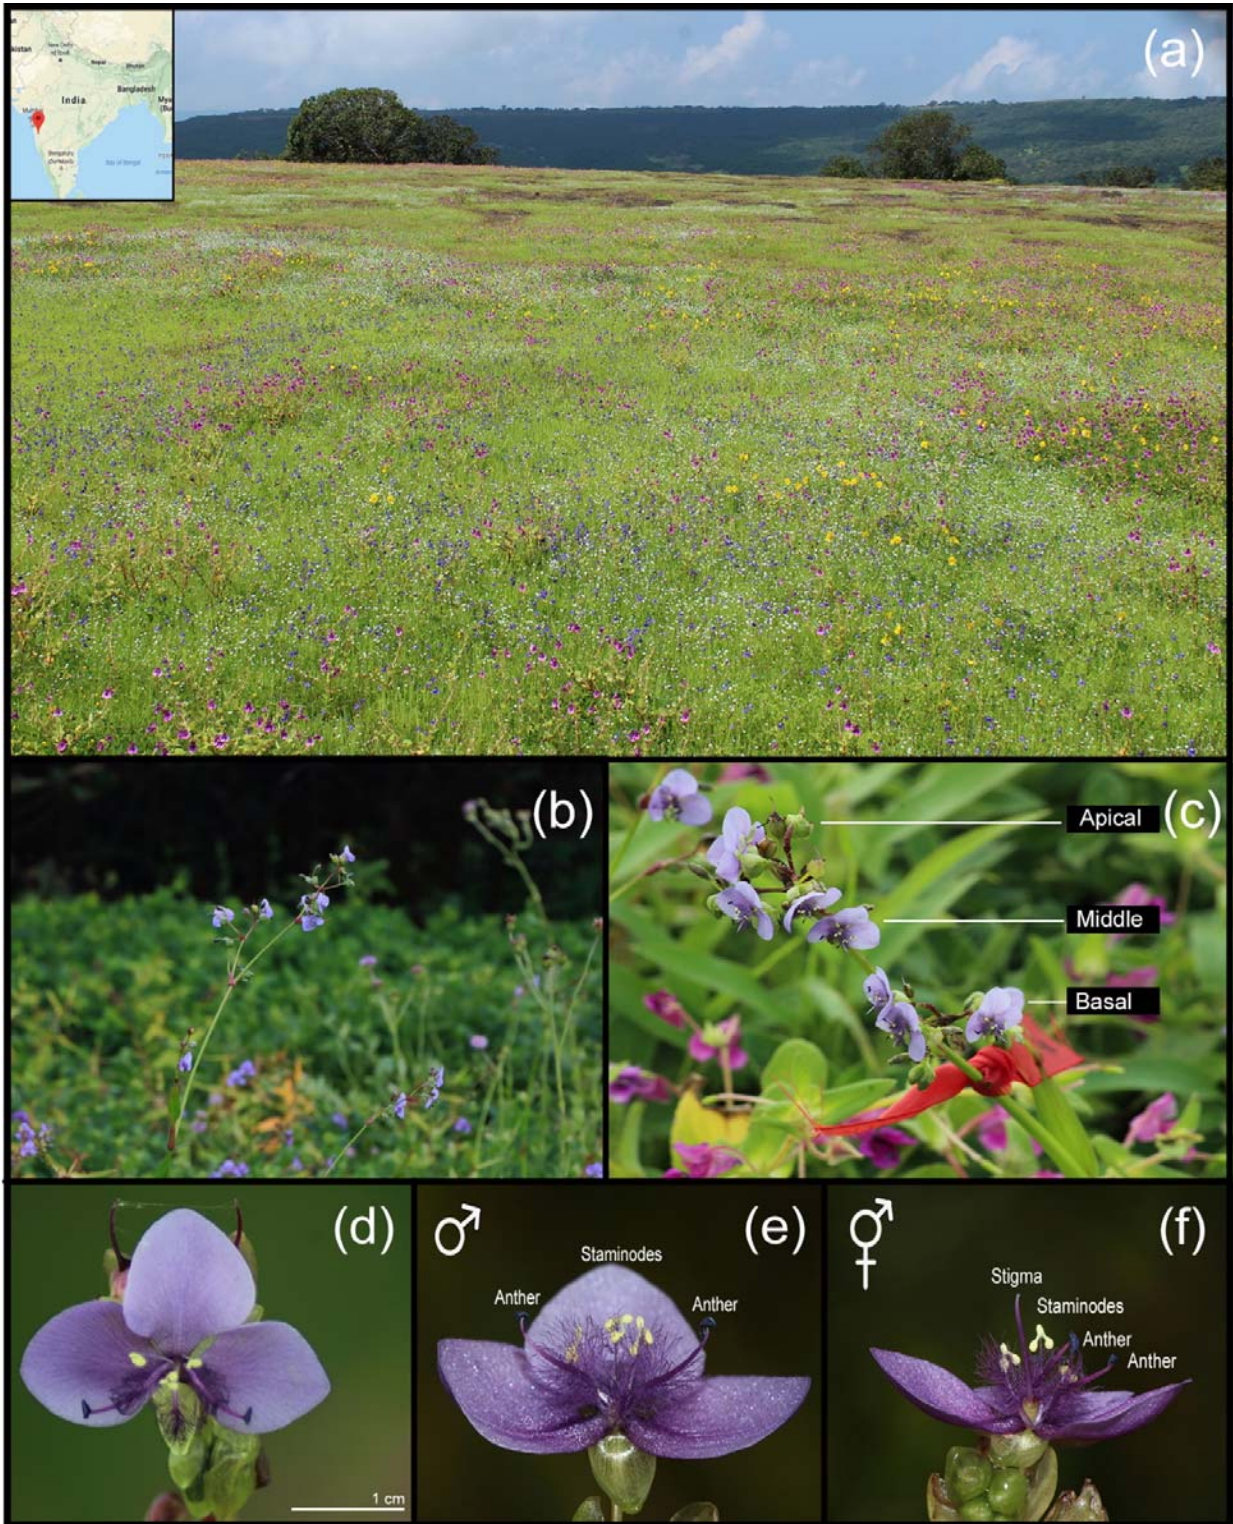

771 Fig. 1

772 Fig. 2

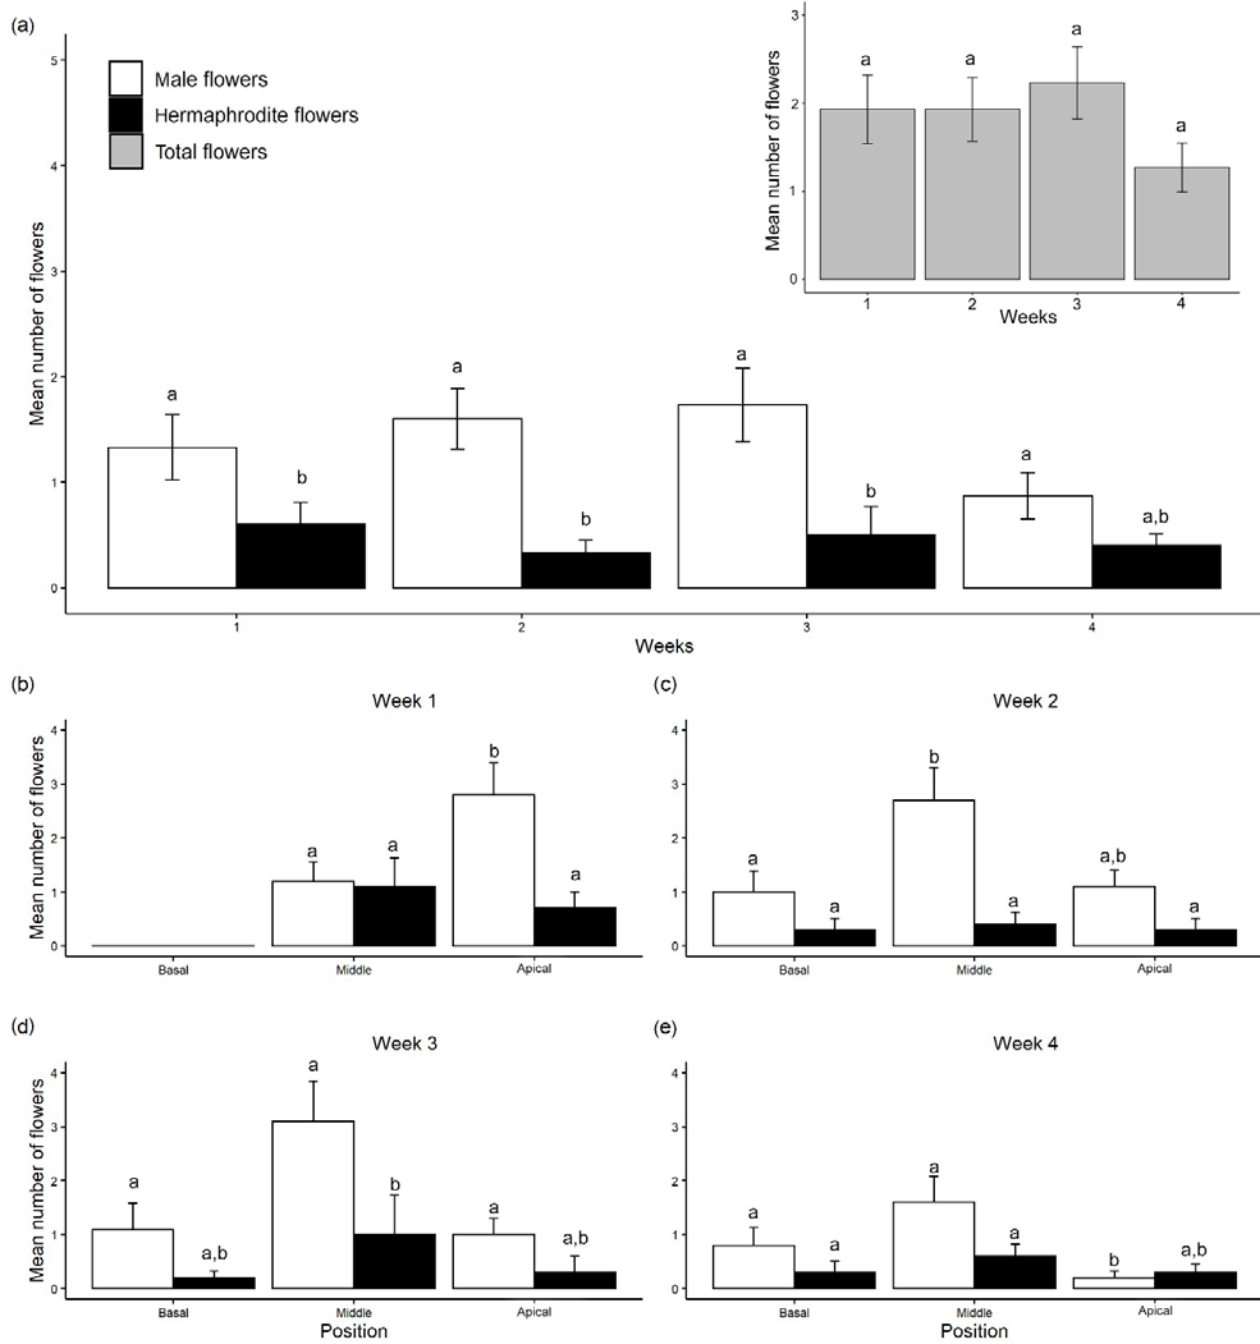

773 Fig. 3

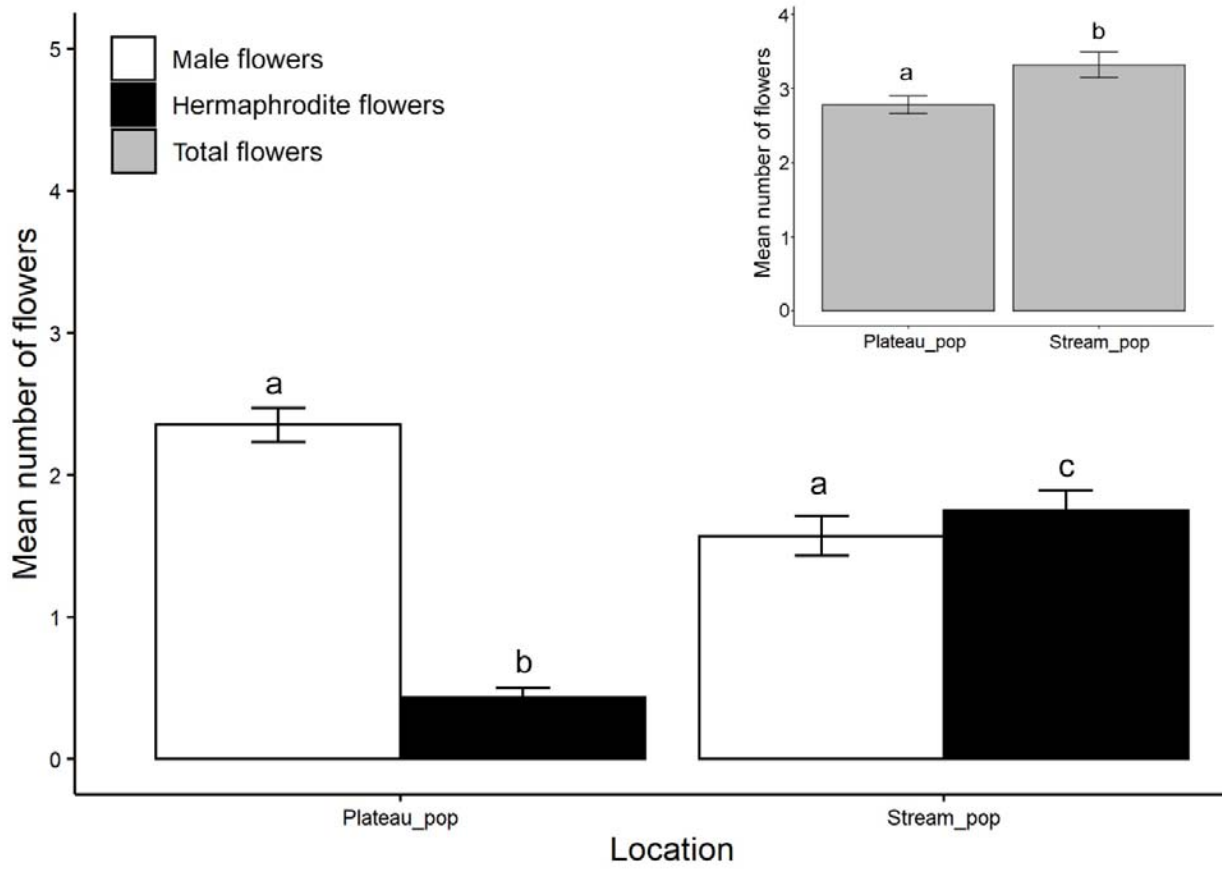

774 Fig. 4

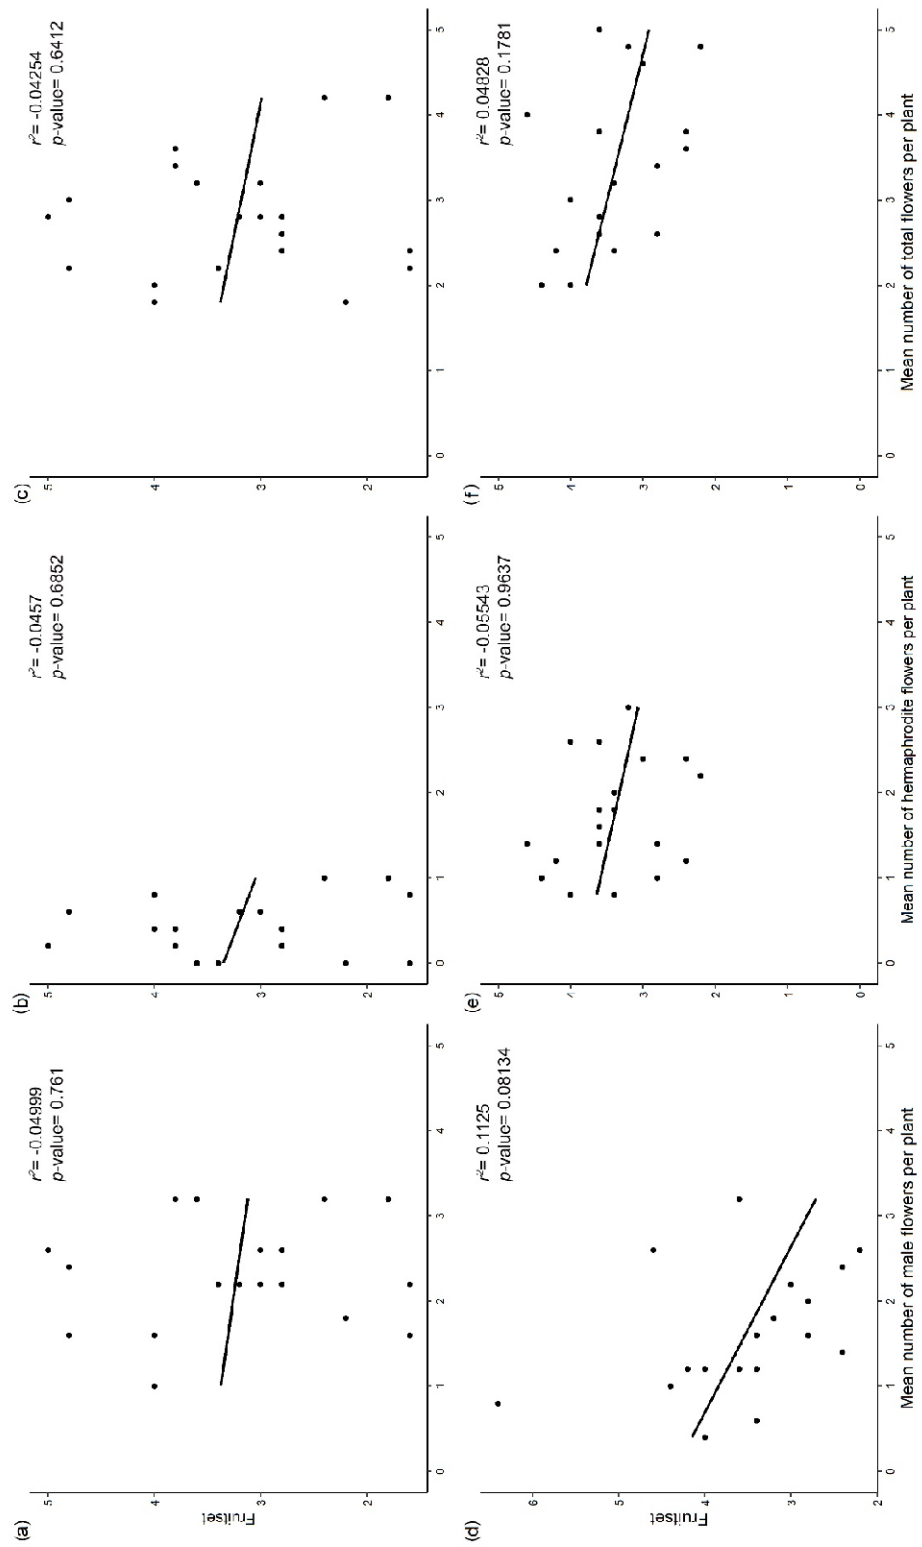

775 Fig. 5

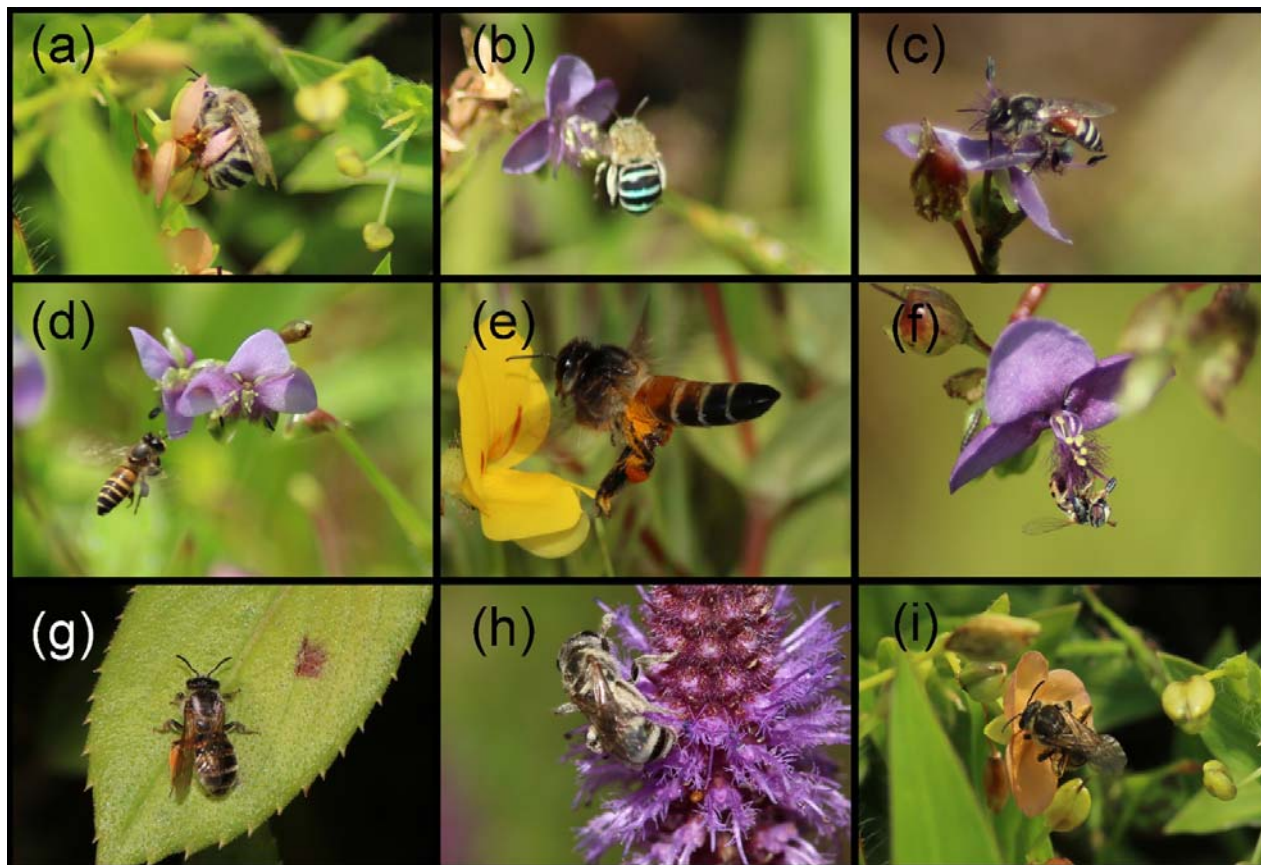

776 Fig. 6

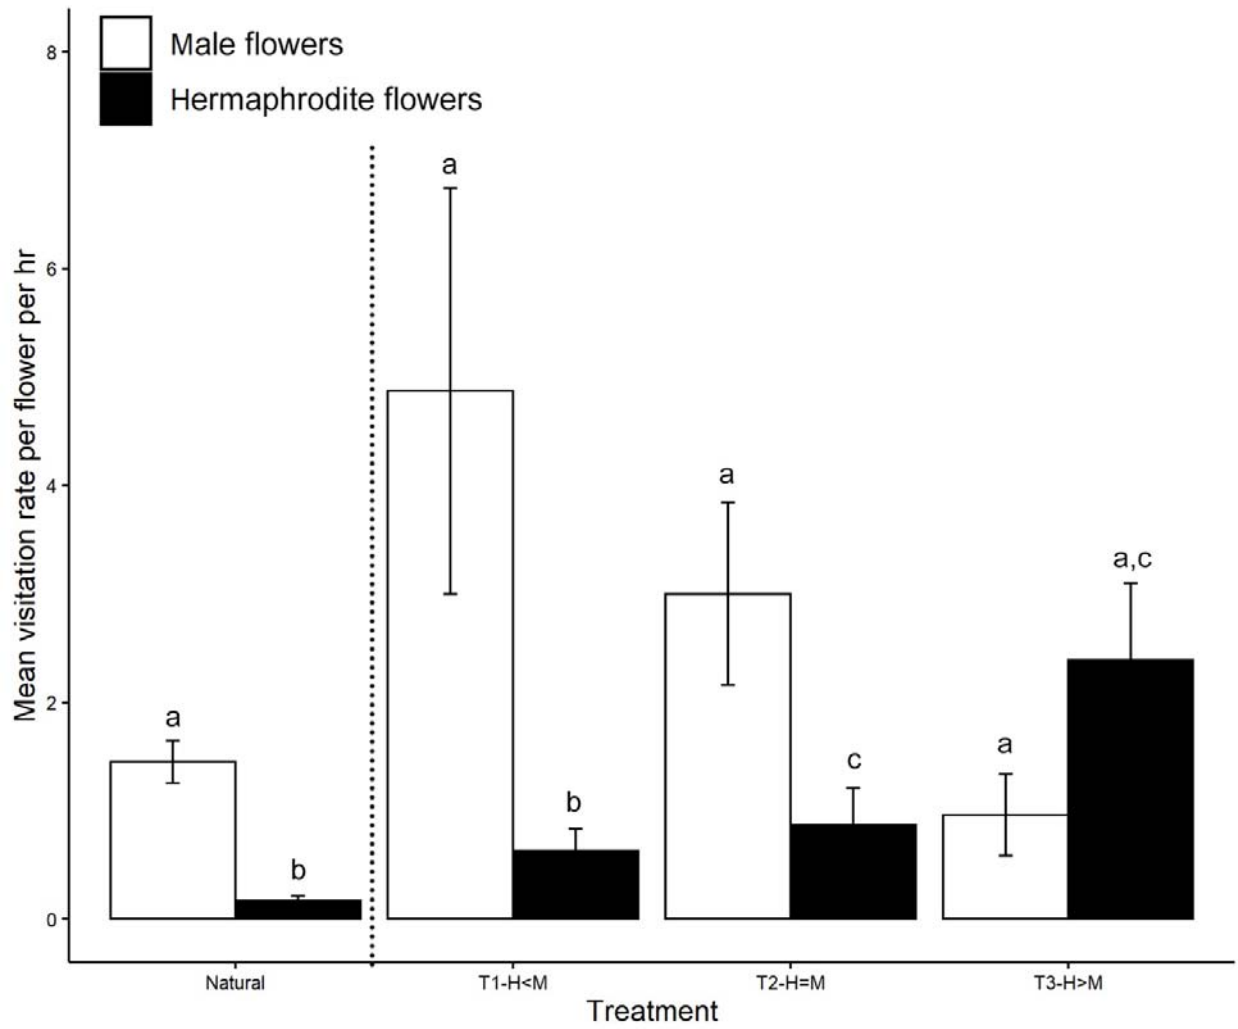

777 Fig. 7

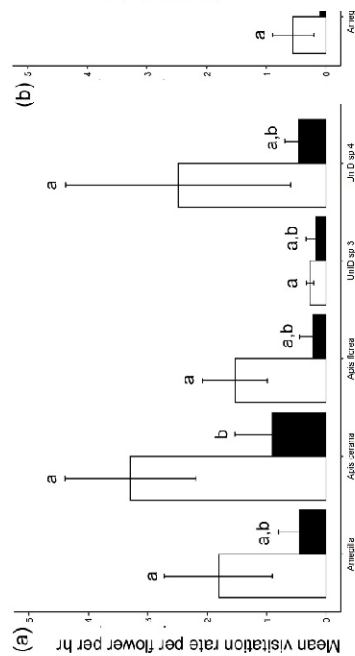

Source: https://www.biorxiv.org/content/10.1101/2020.06.06.138354v1.full.pdf
