# Supplementary material for: When to be a male? Role of resource-limitation and pollinators in determining floral sex in an andromonoecious spiderwort
Source: bioRxiv or medRxiv preprint supplement (doi:10.1101/2020.06.06.138354), 2020-07-08

## Electronic supplementary material

When to be a male? Role of resource-limitation and pollinators in determining gender in an andromonoecious spiderwort.

Asawari Albal<sup>1,3,4</sup>, Azad G<sup>1</sup>, Saket Shrotri<sup>1</sup>, Vinita Gowda<sup>1,2</sup>

<sup>1</sup> Tropical Ecology and Evolution (TrEE) Lab, Department of Biological Sciences, Indian Institute of Science Education and Research  
Bhopal, Bhopal, 462066, India

<sup>2</sup> Corresponding author: Vinita Gowda, [gowdav@iiserb.ac.in](mailto:gowdav@iiserb.ac.in)

Present address:

<sup>3</sup> Department of Biology, University of Toronto Mississauga, Mississauga, ON L5L 1C6, Canada

<sup>4</sup> Ecology and Evolutionary Biology, University of Toronto, Toronto, ON M5S 2Z9, Canada

Year-wise variation in the fruit set of *M. simplex* on the Kaas plateau: -

In 2017, the mean fruit set per plant was not affected by the mean number of hermaphrodite flowers (Fig. S4a:  $r^2 = -0.02284$ ,  $df = 24$ ,  $p$ -value = 0.5126) or mean number of male flowers (Fig. S4b:  $r^2 = 0.0405$ ,  $df = 24$ ,  $p$ -value = 0.1646) respectively, but showed a positive effect with the total number of flowers present per plant (Fig. S4c:  $r^2 = 0.12$ ,  $df = 24$ ,  $p$ -value = 0.04642). However in 2019, the mean fruitset per plant showed no effect with the mean number of hermaphrodite flowers (Fig. S4d:  $r^2 = -0.01361$ ,  $df = 38$ ,  $p$ -value = 0.4943), mean number of male flowers (Fig. S4e:  $r^2 = 0.05935$ ,  $df = 38$ ,  $p$ -value = 0.07059), or total number of flowers present per plant, respectively (Fig. S4f:  $r^2 = -0.002529$ ,  $df = 38$ ,  $p$ -value = 0.3484).

## Tables

**Table S1** Kruskal-Wallis test results of floral gender distribution (H = hermaphrodite, M = male, T = total flowers) in *M. simplex* across four weeks in 2018 showing the temporal variation in gender distribution (Fig. 2a; Kruskal-Wallis chi-squared = 38.7067,  $df = 7$ ,  $p$ -value = 0.00; Fig 2a inset; Kruskal-Wallis chi-squared = 3.2847,  $df = 3$ ,  $p$ -value = 0.3498;  $P < 0.025$ ).

| Week | Week         | 1              |        |        | 2              |                |        | 3              |        |        | 4      |
|------|--------------|----------------|--------|--------|----------------|----------------|--------|----------------|--------|--------|--------|
|      | Gender/total | H              | M      | T      | H              | M              | T      | H              | M      | T      | H      |
| 1    | M            | <b>0.0154*</b> |        |        |                |                |        |                |        |        |        |
|      | H            | 0.2843         | -      | -      |                |                |        |                |        |        |        |
| 2    | M            | -              | 0.1181 | -      | <b>0.0000*</b> |                |        |                |        |        |        |
|      | T            | -              | -      | 0.4066 | -              | -              |        |                |        |        |        |
| 3    | H            | 0.2218         | -      | -      | 0.4222         | -              | -      |                |        |        |        |
|      | M            | -              | 0.1549 | -      | -              | 0.4328         | -      | <b>0.0000*</b> |        |        |        |
|      | T            | -              | -      | 0.2566 | -              | -              | 0.3382 | -              | -      |        |        |
| 4    | H            | 0.4669         | -      | -      | 0.3131         | -              | -      | 0.2472         | -      | -      |        |
|      | M            | -              | 0.1762 | -      | -              | <b>0.0172*</b> | -      | -              | 0.0258 | -      | 0.0947 |
|      | T            | -              | -      | 0.1399 | -              | -              | 0.0939 | -              | -      | 0.0414 | -      |

**Table S2** Kruskal-Wallis test results of floral gender distribution (H = hermaphrodite, M = male) in *M. simplex* between two populations (Fig. 3; Kruskal-Wallis chi-squared = 123.5274, df = 3,  $p$ -value = 0;  $P < 0.025$ ).

| Comparative groups           | $p$ -value     |
|------------------------------|----------------|
| Plateau_pop M: Plateau_pop H | <b>0.0000*</b> |
| Stream_pop H: Plateau_pop H  | <b>0.0000*</b> |
| Stream_pop M: Plateau_pop M  | <b>0.0000*</b> |
| Stream_pop M: Stream_pop H   | 0.1614         |

**Table S3** Kruskal-Wallis test results of temporal variation in floral gender distribution within an inflorescence in *M. simplex* (Fig. 2b-e;  $P < 0.025$ ). Floral gender was quantified at three positions within an inflorescence: basal, middle (mid) and apical (see Fig. 1c).

| Comparative groups | Week 1         | Week 2         | Week 3         | Week 4         |
|--------------------|----------------|----------------|----------------|----------------|
|                    | $p$ -value     | $p$ -value     | $p$ -value     | $p$ -value     |
| Basal H: Basal M   | <b>0.0014*</b> | 0.0252         | 0.0377         | 0.3547         |
| Basal H: Mid H     | 0.3912         | 0.3744         | 0.2759         | 0.1844         |
| Basal M: Mid M     | <b>0.0216*</b> | 0.0373         | 0.0377         | <b>0.0027*</b> |
| Mid H: Mid M       | 0.2472         | <b>0.0003*</b> | <b>0.0015*</b> | 0.0661         |
| Basal H: Apical H  | 0.0590         | 0.5000         | 0.4543         | 0.4132         |
| Mid H: Apical H    | 0.0329         | 0.3744         | 0.3155         | 0.1318         |
| Basal M: Apical M  | <b>0.0000*</b> | 0.2817         | 0.4686         | 0.0700         |
| Mid M: Apical M    | <b>0.0058*</b> | <b>0.0091*</b> | 0.0316         | 0.0967         |
| Apical H: Apical M | 0.5000         | 0.0840         | 0.0565         | 0.0930         |

**Table S4** Mean±SE for the distribution of floral gender (M- male, H- hermaphrodite) at three positions- basal, middle, and apical- within an inflorescence in *M. simplex* (Fig. 2b-e).

| Position | Week   | Week 1   | Week 2   | Week 3   | Week 4   |
|----------|--------|----------|----------|----------|----------|
|          | Gender |          |          |          |          |
| Basal    | M      | 0        | 1±0.39   | 1.1±0.48 | 0.8±0.33 |
|          | H      | 0        | 0.3±0.21 | 0.2±0.13 | 0.3±0.21 |
| Middle   | M      | 1.2±0.36 | 2.7±0.6  | 3.1±0.74 | 1.6±0.48 |
|          | H      | 1.1±0.53 | 0.4±0.22 | 1±0.73   | 0.6±0.22 |
| Apical   | M      | 2.8±0.59 | 1.1±0.31 | 1±0.3    | 0.2±0.13 |
|          | H      | 0.7±0.3  | 0.3±0.21 | 0.3±0.3  | 0.3±0.15 |

**Table S5** Kruskal-Wallis test results of mean pollinator visitation rate per flower per hour from the manipulative experiments in *M. simplex* (Fig. 6; Kruskal-Wallis test chi-squared= 63.4196, df=7,  $p$ -value=3.122<sup>e-11</sup>; P<0.025).

| Treatment | Gender | Natural        |        | T1             |                | T2             |        | T3     |
|-----------|--------|----------------|--------|----------------|----------------|----------------|--------|--------|
|           |        | H              | M      | H              | M              | H              | M      | H      |
| Natural   | M      | <b>0.0000*</b> |        |                |                |                |        |        |
| T1        | H      | 0.0545         |        |                |                |                |        |        |
|           | M      |                | 0.0412 | <b>0.0060*</b> |                |                |        |        |
| T2        | H      | <b>0.0106*</b> |        | 0.3611         |                |                |        |        |
|           | M      |                | 0.1049 |                | 0.3053         | <b>0.0248*</b> |        |        |
| T3        | H      | <b>0.0000*</b> |        | 0.0277         |                | 0.0457         |        |        |
|           | M      |                | 0.2014 |                | <b>0.0235*</b> |                | 0.0544 | 0.0884 |



**Fig. S1** Measurement of (a) floral width of male and hermaphrodite *M. simplex* flower, (b) 15 pairs arranged on a laminated graph sheet to observe sexual dimorphism (Photo courtesy: Azad G).

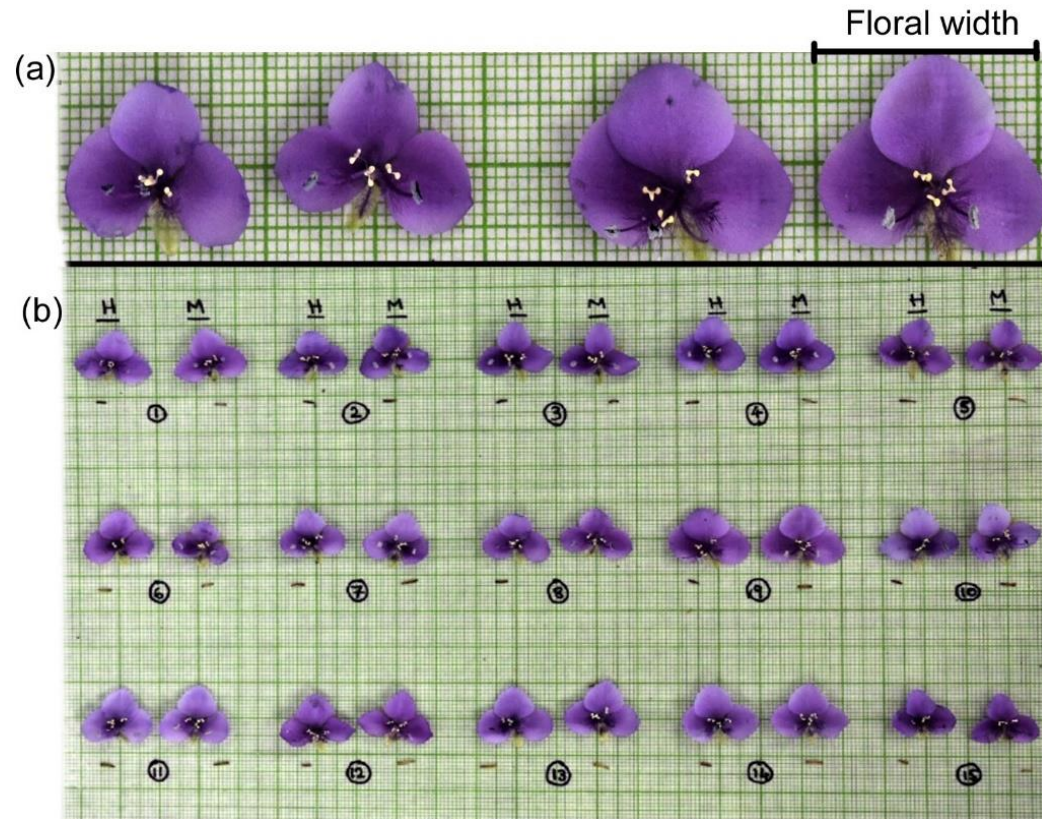

**Fig. S2** Manipulative choice experiment setup: (a) Treatment 1:  $H < M$ , (b) Treatment 2:  $H = M$ , (c) Treatment 3:  $H > M$ ; (d) Experimental setup, 8-20 flowers in total;  $N = 8$  trials. Illustration: Asawari Albal

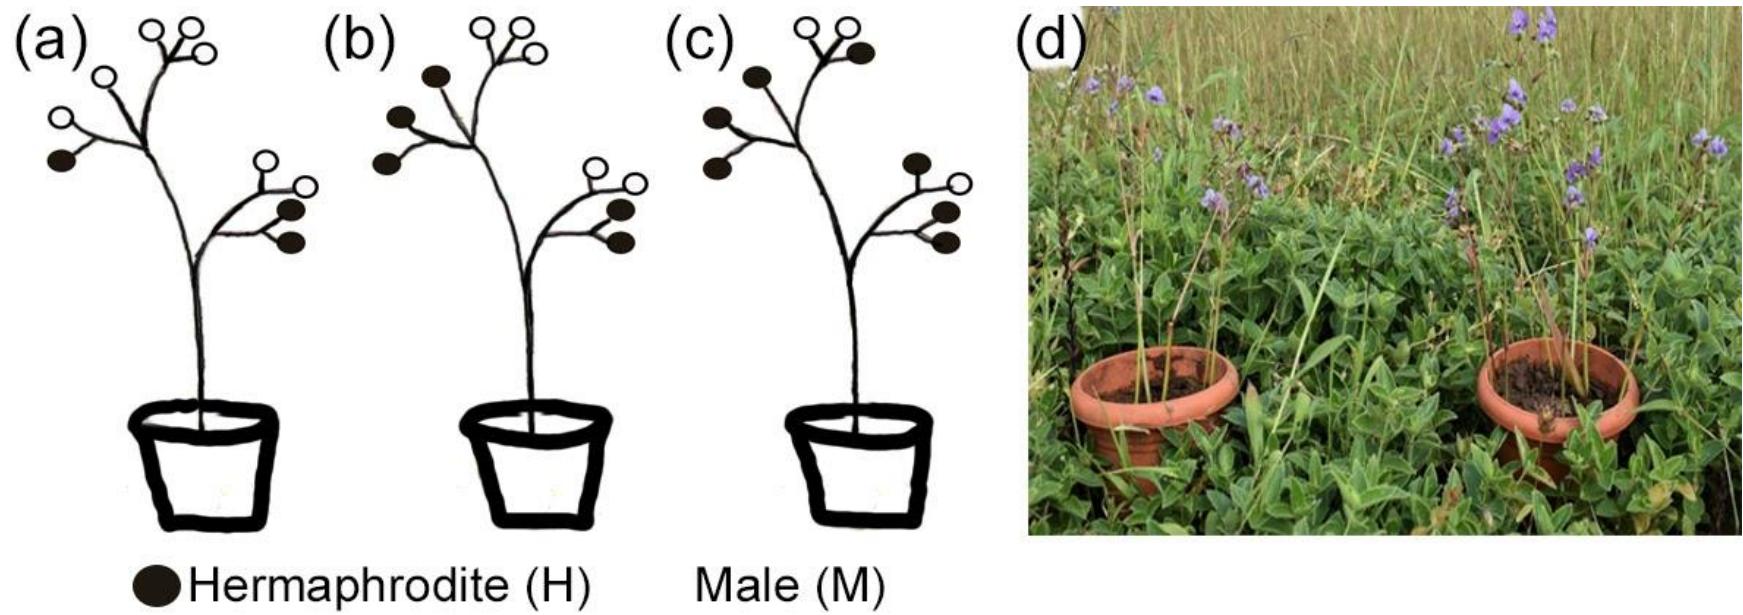

**Fig. S3** Effect of the total number of flowers on display and the mean visitation rate per hour ( $r^2 = -0.03245$ ,  $df = 21$ ,  $p$ -value = 0.5845,  $N = 22$ ) in 2018. The filled circles with solid line represent treatment 1:  $H < M$ , filled triangles with dotted line represent treatment 2:  $H = M$  and filled squares with dash-dotted line represent treatment 3:  $H > M$  for the choice experiment.

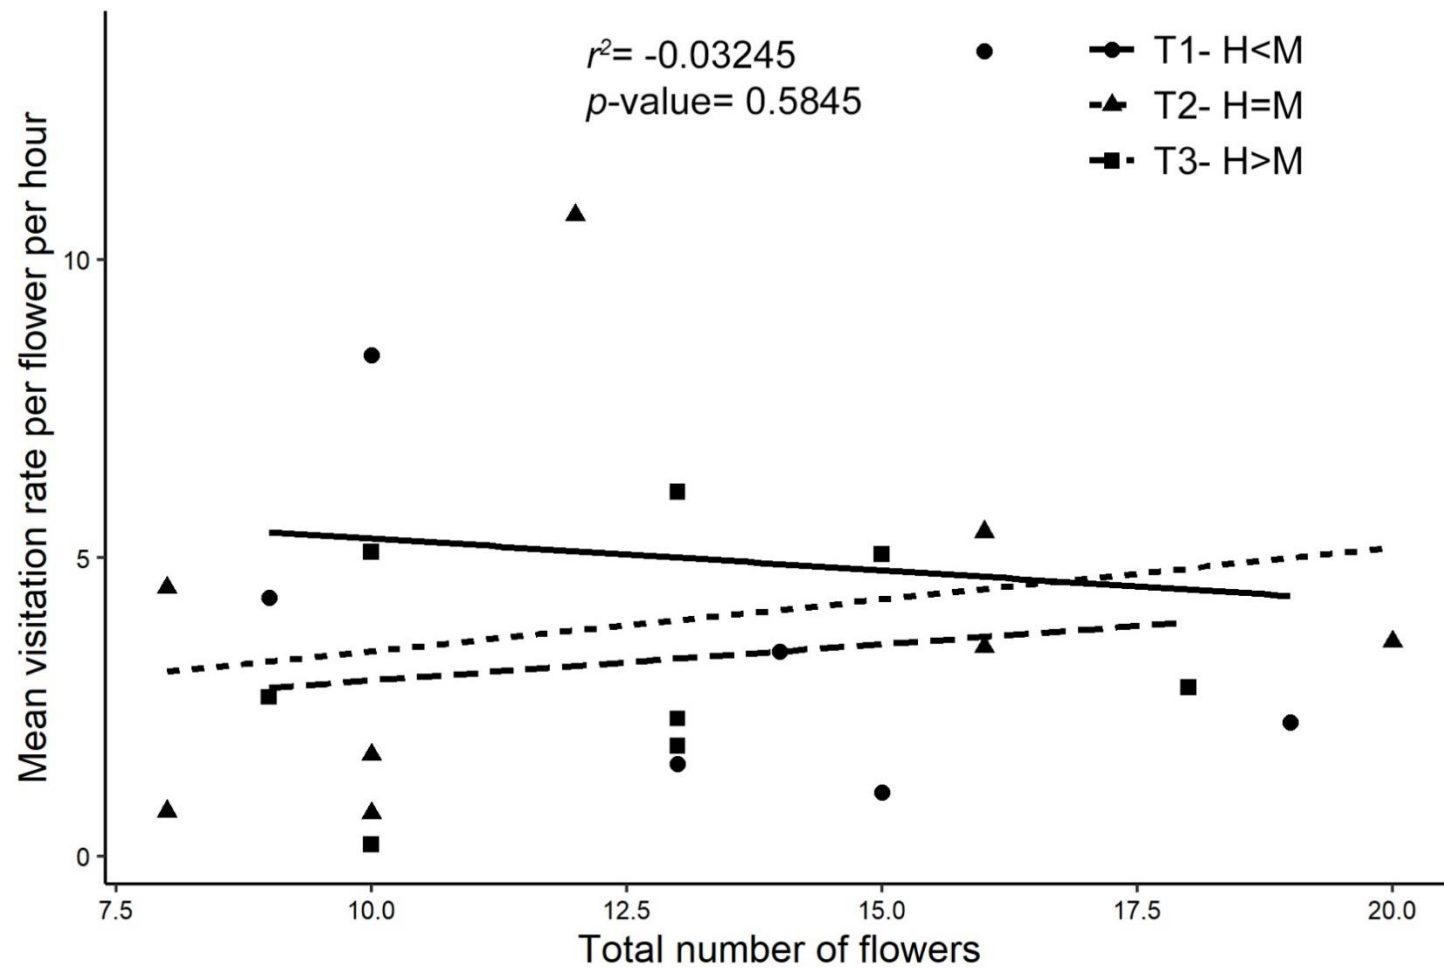



**Fig. S4** Effect on mean fruitset in 2017- (a) by mean number of male flowers ( $r^2 = 0.0405$ ,  $df = 24$ ,  $p$ -value = 0.1646,  $N = 26$ ), (b) by mean number of hermaphrodite flowers ( $r^2 = -0.02284$ ,  $df = 24$ ,  $p$ -value = 0.5126,  $N = 26$ ) and (c) by mean number of total flowers per plant in ( $r^2 = 0.12$ ,  $df = 24$ ,  $p$ -value = 0.04642,  $N = 26$ ). Effect of mean fruitset in 2019- (d) by mean number of male flowers ( $r^2 = -0.01361$ ,  $df = 38$ ,  $p$ -value = 0.4943,  $N = 40$ ), (e) by mean number of hermaphrodite flowers ( $r^2 = 0.05935$ ,  $df = 38$ ,  $p$ -value = 0.07059,  $N = 40$ ), (f) by mean number of total flowers ( $r^2 = -0.002529$ ,  $df = 38$ ,  $p$ -value = 0.3484,  $N = 40$ ).

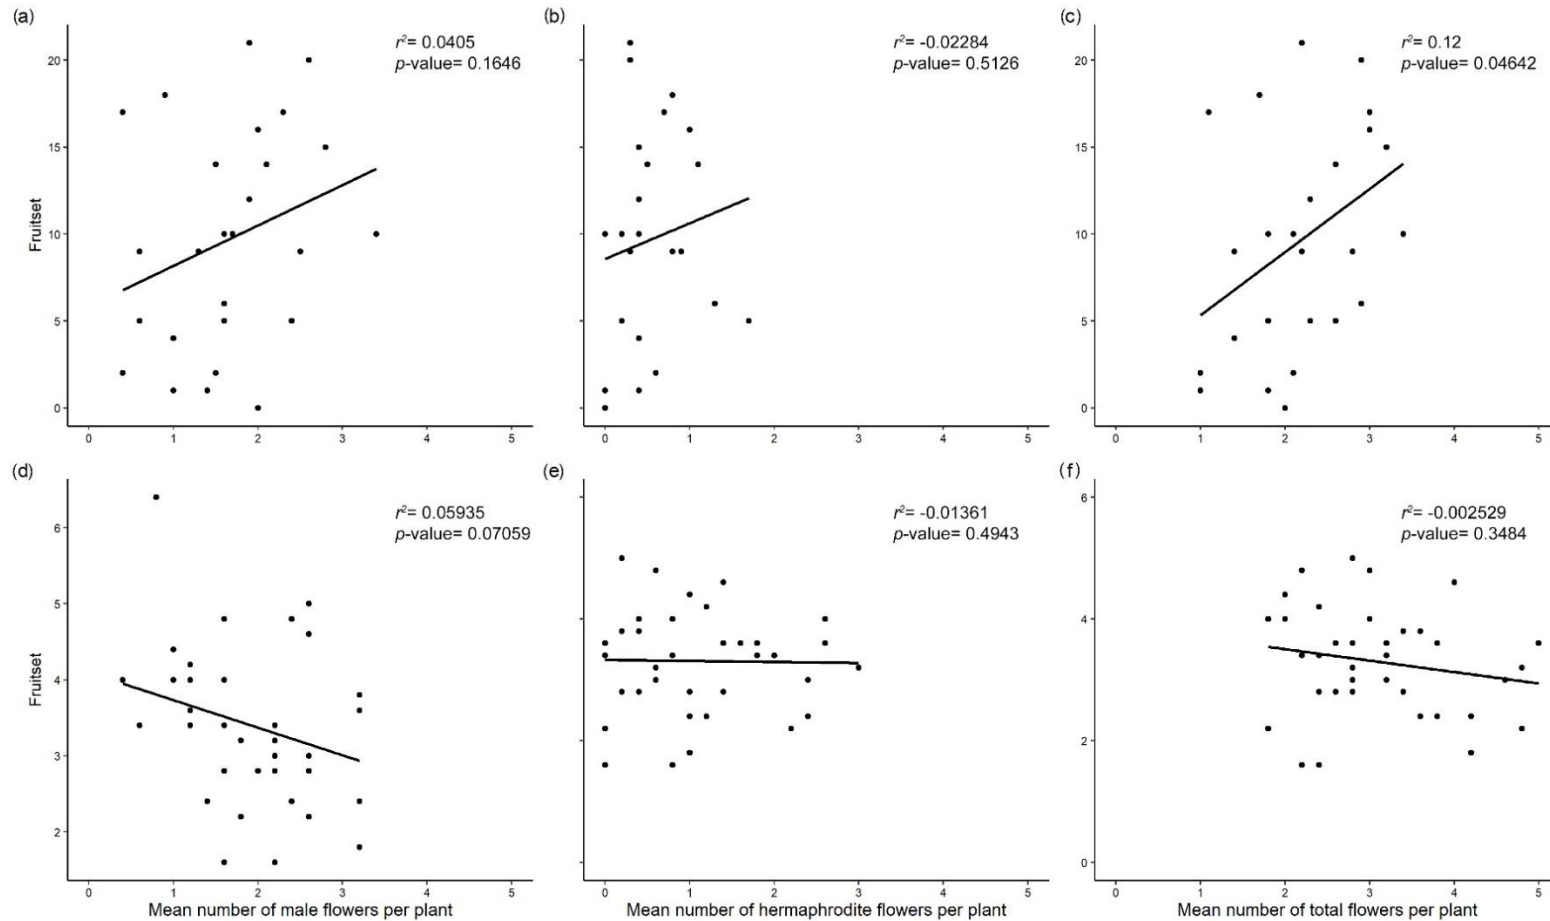

**Fig. S5** Variation in gender in *M. simplex* across two years 2017 and 2018 (Pooled data; Kruskal-Wallis chi-squared = 281.61,  $df = 7$ ,  $p$ -value  $< 2.2 \times 10^{-16}$ ). Columns to be compared within the week and within gender across all 4 weeks (Mean $\pm$ SE). Significant  $p$ -values depicted by different alphabets.

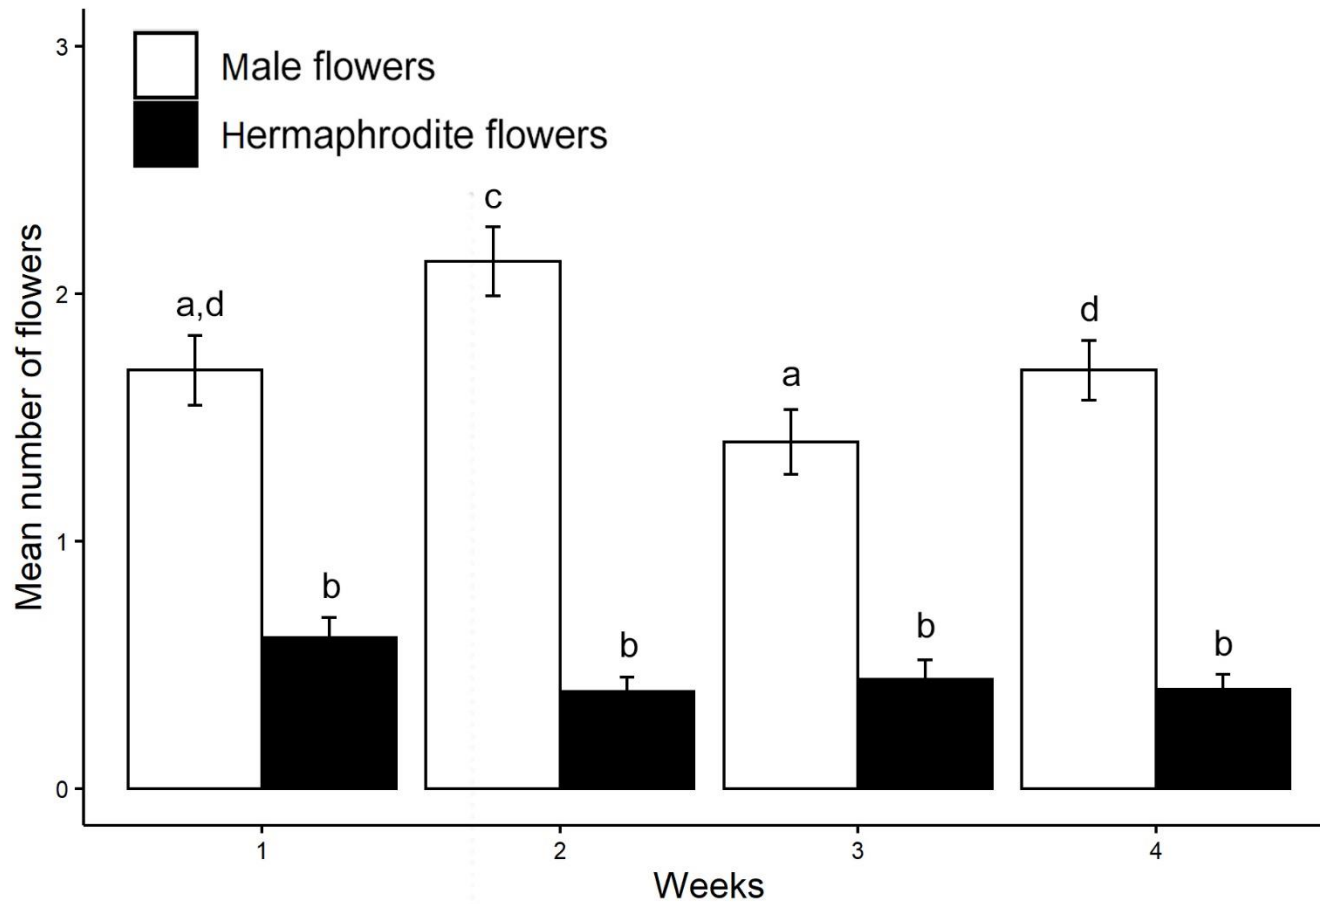

Supplement: Supplementary file [file media-1.pdf]
